1 **Oral feeding with probiotic *Lactobacillus rhamnosus* attenuates cigarette smoke-induced COPD in**

2 **C57Bl/6 mice: Relevance to inflammatory markers in human bronchial epithelial cells**

3

4 **J.L. Carvalho<sup>1</sup>, M. Miranda<sup>1</sup>, A.K. Fialho<sup>1</sup>, H. Castro-Faria-Neto<sup>2</sup>, E. Anatriello<sup>1</sup>, A.C. Keller<sup>3</sup>, F.**

5 **Aimbire<sup>1</sup>**

6

7 <sup>1</sup>Department of Science and Technology, Federal University of São Paulo, São José dos Campos, SP,

8 Brazil; <sup>2</sup>Laboratory of Immunopharmacology, FioCruz, Rio de Janeiro, Brazil;

9 <sup>3</sup>Department of Microbiology, Immunology and Parasitology, Federal University of São Paulo, São

10 Paulo, SP, Brazil

11

12

13

14 **Corresponding author:**

15 flavio.aimbire@unifesp.br

16

17 **Short title:** *Lactobacillus rhamnosus* attenuates *in vivo* COPD



## 18 Abstract

19 COPD is a prevalent lung disease with significant impacts on public health. Affected airways  
20 exhibit pulmonary neutrophilia and consequent secretion of pro-inflammatory cytokines and proteases,  
21 which result in lung emphysema. Probiotics act as nonspecific modulators of the innate immune system  
22 that improve several inflammatory responses. To investigate the effect of *Lactobacillus rhamnosus* (*Lr*) on  
23 cigarette smoke (CS)-induced COPD C57Bl/6 mice were treated with *Lr* during the week before COPD  
24 induction and three times/week until euthanasia. For *in vitro* assays, murine bronchial epithelial cells as  
25 well as human bronchial epithelial cells exposed to cigarette smoke extract during 24 hours were treated  
26 with *Lr* 1 hour before CSE addition. *Lr* treatment attenuated the inflammatory response both in the airways  
27 and lung parenchyma, reducing neutrophilic infiltration and the production of pro-inflammatory cytokines  
28 and chemokines. Also, *Lr*-treated mice presented with lower metalloproteases in lung tissue and lung  
29 remodeling. In parallel to the reduction in the expression of TLR2, TLR4, TLR9, STAT3, and NF- $\kappa$ B in  
30 lung tissue, *Lr* increased the levels of IL-10 as well as SOCS3 and TIMP1/2, indicating the induction of an  
31 anti-inflammatory environment. Similarly, murine bronchial epithelial cells as well as human bronchial  
32 epithelial cells (BEAS) exposed to CSE produced pro-inflammatory cytokines and chemokines, which  
33 were inhibited by *Lr* treatment in association with the production of anti-inflammatory molecules.  
34 Moreover, the presence of *Lr* also modulated the expression of COPD-associated transcription found into  
35 BALF of COPD mice group, i.e., *Lr* downregulated expression of NF- $\kappa$ B and STAT3, and inversely  
36 upregulated increased expression of SOCS3. Thus, our findings indicate that *Lr* modulates the balance  
37 between pro- and anti-inflammatory cytokines in human bronchial epithelial cells upon CS exposure and it  
38 can be a useful tool to improve the lung inflammatory response associated with COPD.

39  
40 **Keywords:** COPD; lung inflammation; airway remodeling; toll-like receptor; transcription factors; human  
41 bronchial epithelial cell; probiotic

## 43 **1. Introduction**

44           Although chronic obstructive pulmonary disease (COPD) is one of the major chronic health  
45 conditions in which disability and death rates are increasing worldwide, the development of new strategies  
46 to disease management remains underwhelming [1-3]. Although the intrinsic factors that contribute to  
47 COPD development remains subject of discussion, the cigarette smoke is well recognized as a risk factor for  
48 the disease [3].

49 Chemokines such as CXCL1 and CXCL8 as well as cytokines TNF, IL-1 $\beta$ , IL-6, and IL-17 are  
50 chemotactic factors that attract inflammatory cells to the injured lung, principally neutrophils and  
51 monocyte-derived macrophage [4-7], where the pulmonary destruction initiates, compromising the alveolar  
52 parenchyma [8]. Exacerbated activity of metalloproteinases from neutrophils in COPD patients is  
53 responsible for destruction of alveolar parenchyma [9-12]. In COPD, neutrophils release proteinases into  
54 lung milieu, such as metalloproteases MMP-9 and MMP-12, result in emphysema [13] where the immune  
55 system switches to a Th17 response to promote the perpetuation of inflammation [14]. The effects of  
56 matrix metalloproteinase (MMP) can be inhibited by tissue inhibitors of metalloproteinase (TIMP) secreted  
57 by several cells [15]. During the pathogenesis of COPD, the balance between the effects of MMP and its  
58 TIMP is dysregulated [16-18], since that MMP released by neutrophils overlaps with TIMP activity with  
59 consequent pulmonary tissue destruction.

60 In parallel to the cytokine storm, the transcription factors NF- $\kappa$ B and the balance between STAT3/SOCS3  
61 (suppressor of cytokine signaling 3) signaling are also present in the COPD pathogenesis through secretion  
62 of pro-inflammatory mediators, such as TNF, IL-8, IL-33, CXCL1, CXCL9, and CCL2 from bronchial  
63 epithelial cells [19, 20]. Some authors have evidenced an unbalanced SOCS3/STAT3 in *in vivo* COPD as  
64 well as in emphysematous patients [21-23]. This phenomenon is characterized by a reduced SOCS3  
65 expression associated with increased STAT3 causing pulmonary fibrosis.

66 Cigarette pollutants can directly trigger pathogen-associated molecular patterns (PAMPs) such as toll-like  
67 receptors (TLRs), particularly TLR2 and TLR4, to initiate pattern recognition [24]. TLRs are present in  
68 dendritic cells, alveolar macrophages, neutrophils, and epithelial cells, and they have been correlated to  
69 lung inflammation caused by COPD [3]. Among them, the expression of TLR2, TLR4, and TLR9 is  
70 elevated in monocytes and TLRs are associated with number of sputum neutrophils, secretion of pro-

71 inflammatory cytokines, and lung function impairment [25-27]. This is a reflex of the immune dysfunction  
72 observed in COPD [28, 29].  
73 Some airways structural cells, such as the bronchial epithelium, when exposed to cigarette smoke secrete  
74 pro-inflammatory mediators activating alveolar macrophages as well as attracting neutrophils and activated  
75 lymphocytes towards the injured tissue [13, 30]. In fact, the airway epithelial cells are interface between  
76 innate and adaptive immunity. Moreover, the bronchial epithelial cells also discharge transforming growth  
77 factor- $\beta$  (TGF $\beta$ ), which triggers fibroblast proliferation for tissue remodeling [14, 31]. Therefore, small  
78 airway-wall remodeling strongly contributes to airflow limitation in COPD, decline in lung function, and  
79 poor responses to available therapies [32-34].  
80 Due to the high morbidity and the limitations of existing COPD treatments [1, 35], innovative action is  
81 needed against airway inflammation as well as lung emphysema to better control the disease. One effective  
82 treatment for COPD may be to attenuate immune response driven to pro-inflammatory mediators and at the  
83 same time upregulate the secretion of anti-inflammatory proteins in lung milieu. Therefore, the ability of  
84 probiotics to modulate the immune response and the effects of their use to prevent the development of  
85 various chronic diseases, including COPD and asthma, has caught the attention of many researchers [36-  
86 40]. Little is known, however, concerning the nature of the probiotic-host cell interactions, or how these  
87 interactions could be manipulated to obtain stronger regulatory responses in treatment against COPD.  
88 Thus, we aim to investigate whether the oral feeding with probiotic *Lactobacillus rhamnosus* can  
89 beneficially modulate the immune response and attenuate lung inflammatory response in *in vivo* COPD  
90 model induced by cigarette smoke.

91

## 92 **2. Material and Methods**

### 93 **2.1. Animals**

94 Three-month-old male C57Bl/6 mice were used. They were purchased from Center for the  
95 Development of Experimental Models (CEDEME) of the Federal University of São Paulo (UNIFESP),  
96 housed under controlled humidity, light and temperature conditions, inside ventilated polyethylene cages,  
97 in the vivarium located at Science and Technology Institute at the UNIFESP in São José dos Campos, SP,  
98 Brazil. The animals had food (Nuvilab – Quimtia, Brazil) and water ad libitum. The mice were

99 anesthetized with ketamine (100 mg/kg) and xylazine (10 mg/kg) via i.p. and euthanized with excess  
100 anesthetics. The experiments were approved according to CONCEA (2016) and the Research Ethics  
101 Committee on Animal Use (CEUA) of UNIFESP under the register 9034130216.

102

## 103 **2.2. Induction of COPD and Preparation of the cigarette smoke** 104 **extract (CSE).**

105 The *in vivo* COPD was induced in C57Bl/6 mice by inhaling smoke from 14 cigarettes for 60  
106 days, 7 days/week, for 30 min. The smoke was pumped into a plastic box measuring 42 cm (length) × 28  
107 cm (width) × 27 cm (height), where the animals were kept and passively inhaled the cigarette smoke. For  
108 the *in vitro* experiments, the cigarette smoke extract (CSE) was prepared through the burning of 14  
109 commercial cigarettes (tar: 13 mg; nicotine: 1.10 mg; carbon monoxide: 10 mg) using a vacuum machine  
110 (Nevoni – 1001 VF-PE. Series: 304 - Brazil) with -11 Kpa to be incorporated into PBS.

111

## 112 **2.3. Oral feeding with *Lactobacillus rhamnosus***

113 The mice were treated via gavage with probiotic *Lactobacillus rhamnosus* (*Lr*) ( $1 \times 10^9$  CFU/0.2  
114 mL PBS/mouse) (Liane Laboratory, Ribeirão Preto, SP) each day for seven days prior to the COPD  
115 induction and then 3 times/week until euthanasia. The experimental protocol is illustrated in Figure 1.

116

117 **Fig 1. Time schedule of COPD model and probiotic treatment.** Male C57Bl/6 mice were exposed to  
118 inhalation of cigarette smoke (14 cigarettes; 30 minutes/day; 7 days/week; during 60 days) for COPD  
119 induction and treated with *Lactobacillus rhamnosus* (*Lr*) ( $10^9$  CFU/0.2 mL PBS/mouse) for seven days  
120 prior to the COPD induction and, after that, 3 times/week until the day of the euthanasia.

121

## 122 **2.4. Murine bronchial epithelial cells and culture conditions.**

123 The lungs were removed and immersed in sterile enzymatic solution for digestion with dispase II  
124 for 60 min. After digestion, the cells were resuspended in cell basal medium that contained growth factors  
125 for epithelial cells and placed in petri dishes for 20 min. Adherent cells were collected and resuspended in

126 RPMI 1640 plus fetal bovine serum, penicillin, and streptomycin and then maintained in culture until the  
127 third passage. The cells were stimulated with 2.5% cigarette smoke extract (CSE) incorporated into the  
128 culture medium as detailed in subsection 2.4 (BEAS cells and culture condition). The treatment with  
129 *Lactobacillus rhamnosus* (*Lr*) was performed 1 h before CSE addition in culture medium with murine  
130 bronchial epithelial cells. Then 24 hours after CSE addition, the culture supernatants were removed, and  
131 stored at -40°C until use.

132

133

## 134 **2.5. Human bronchial epithelial cells (BEAS-2B) and culture** 135 **conditions.**

136 The lineage of human bronchial epithelium cells (BEAS-2B (ATCC® CRL-9609™)) were  
137 isolated from normal human bronchial epithelium obtained from autopsy of healthy individuals and were  
138 acquired from American Type Culture Collection (Manassas, VA). BEAS cells were cultured in small  
139 airway cell basal medium that contained growth factors for epithelial cells. The cells used were between  
140 the 45<sup>th</sup> and 55<sup>th</sup> generation passages. BEAS cells were washed with medium and introduced into each  
141 well of 24-well culture plates in triplicate at a concentration of  $6 \times 10^5$  cells.mL<sup>-1</sup>. After 12 hours, BEAS  
142 cells were exposed to cigarette smoke extract (CSE) and probiotic ( $1 \times 10^5$  UFC of *Lr*). The CSE was  
143 made from 1 unfiltered cigarette which was burned in 10 mL of culture medium. A vacuum pump was  
144 used at a pressure of -11 Kpa so that the cigarette smoke could be incorporated into the culture medium.  
145 Cells were stimulated with 2.5% CSE incorporated into the culture medium. The treatment with probiotic  
146 was performed 1 h before CSE addition in culture medium with BEAS cells. Then, 24 hours after CSE  
147 addition, the culture supernatants were removed, and stored at -40°C until use.

148

149

## 150 **2.6. Experimental Groups**

151 The animals were randomly divided into 3 groups of 7 animals each: control (pure air inhalation  
152 for 60 days); COPD (14 cigarettes smoke inhalation for 60 days; 30 min a day; 7 days/week); *Lr* + COPD  
153 (14 cigarettes smoke inhalation for 60 days; 30 min a day, 7 days/week + *Lactobacillus rhamnosus*). The  
154 animals received *Lr* ( $10^9$  CFU/0.2 mL PBS/mouse) every day for the entire week before inhalation of CS

155 and, after that, 3 days/week until euthanasia. For *in vitro* assays, murine bronchial epithelial cells or  
156 BEAS cells were divided in 3 groups: control (culture medium alone), COPD (murine bronchial epithelial  
157 cells or BEAS cells exposed to CSE), and *Lr* + COPD (murine bronchial epithelial cells or BEAS cells  
158 exposed to *Lr* 1-hour prior to addition of CSE in culture medium). The murine bronchial epithelial cells  
159 or BEAS cells were incubated with a density of  $5 \times 10^5$  /mL of *Lr*.

160

## 161 **2.7. Bronchoalveolar lavage fluid (BALF)**

162 After the mice were euthanized with excess anesthetics, the trachea was cannulated, and lungs  
163 were rinsed with 0.6 mL of cold PBS (saline). This was followed by 2 additional washings with the same  
164 saline volume. Total and differential cell counts of BALF were determined by hemocytometer and  
165 cytopsin preparation stained with Instant-Prov (Newprov, Brazil). Number of eosinophils, macrophages,  
166 neutrophils, and lymphocytes were scored by light microscopy.

167

## 168 **2.8. Histology and image analysis**

169 After the euthanasia, the lungs were carefully removed, perfused, and fixed with 4%  
170 paraformaldehyde for 24 h at a positive pressure (20 cm H<sub>2</sub>O), for histological examination. Paraffin  
171 (Sigma-Aldrich Co., St. Louis, MO, USA) was used to embed the fixed tissue. Lung segments of  
172 approximately 5µm were stained with hematoxylin and eosin (Sigma-Aldrich Co.) for morphometric  
173 analysis of pulmonary emphysema. The parameters analyzed were alveolar wall enlargement (Lm),  
174 peribronchial inflammation, deposition of collagen fibers, and destruction of elastic fibers. Five airways  
175 of all animals were imaged at 400 X magnifications using a Nikon Eclipse E-200 microscope camera and  
176 the software Image Pro-Plus 4.0.

177

### 178 **2.8.1. Alveolar enlargement**

179 Sections of lung tissue were stained with hematoxylin and eosin (Sigma-Aldrich Co.), and the  
180 increased air space was evaluated by the linear mean of the alveolar intercept (Lm) in twenty fields  
181 selected from each slide of lung tissue, with amplification of 200 X. The destruction of the alveolar septa  
182 was evaluated by the technique of counting points in twenty fields randomly throughout the pulmonary  
183 parenchyma (excluding fields presenting airways and pulmonary vessels).



184

185

186

### 187 ***2.8.2. Peribronchial Inflammation***

188 Peribronchial inflammation was obtained through analyzing the space between the basal  
189 membrane and adventitia. The number and type of cells (mononuclear and polymorphonuclear) were  
190 evaluated in this specific area. The results were expressed as number of cells per square millimeter.  
191 Neutrophils were counted according to morphological criteria; groups were blinded. The number of  
192 neutrophils per square millimeter of lung tissue was presented.

193

### 194 ***2.8.3. Collagen Fibers***

195 The collagen deposition in the airways was performed with the addition of Picrosirius staining  
196 (Sigma-Aldrich Co.). The density of the collagen fibers was measured using a standardized color  
197 threshold (red) by the CellSens software from the region between the basal membrane of the epithelium  
198 to the adventitial airway. The results were expressed as  $\mu\text{m}^2$  of collagen fibers/collagen per  $\mu\text{m}^2$  of lung  
199 tissue area.

200

### 201 ***2.8.4. Elastic Fibers***

202 The destruction of elastic fibers in the airways was performed with the addition of Verhoeff Van  
203 Grieson (Sigma-Aldrich Co.) staining for elastic fiber marking. In brief, five airway tissues per animal  
204 (all animals of all groups) were subjected to image analysis using the CellSens software. The density of  
205 the elastic fibers was measured using a standardized color threshold (brown) by the CellSens software for  
206 the region between the basal membrane of the epithelium to the adventitial airway. The results were  
207 expressed in  $\mu\text{m}^2$  of elastic fibers/elastic fibers per  $\mu\text{m}^2$  of lung tissue area.

208

## 209 **2.9. Cytokines and TGF- $\beta$ in BALF, in bronchial epithelial cells and** 210 **lung tissue**

211 The levels of cytokine, chemokines and TGF- $\beta$  in BALF, in murine bronchial epithelial cells, as  
212 well as in BEAS cells were assessed using ELISA kits for mice or human. The ELISA assay kit for mice

213 was also employed to measure the SOCS3 concentration in lung tissue. All ELISA kits were used in  
214 accordance with the manufacturer's instructions. Values are expressed as pg/mL deduced from standard  
215 runs in parallel with recombinant cytokines, chemokines and TGF- $\beta$ .

216

## 217 **2.10. Real-Time Polymerase Chain Reaction (PCR) for MMP-9,** 218 **MMP-12, TIMP1, TIMP2, TLR2, TLR4, TLR9, NF- $\kappa$ B, STAT3 and** 219 **SOCS3**

220 The mRNA expression in the animal lung tissue, in murine bronchial epithelial cells, as well as in  
221 BEAS cells was quantified by real-time PCR for MMP-9: CGGATTTGGCCGTAT TGGGC (forward)  
222 and TGATGGCATGCACTGTGGTC (reverse) and MMP-12: TTTGACCCACTTCGCC (forward) and  
223 GTGACACGACGGAACAG (reverse), TIMP-1: CCACGAATCAAGAGACC (forward) and  
224 GGCCCGTGATGAGAAAC (reverse) and TIMP-2: GGTAGCCTGTGAATGTTCTT (forward) and  
225 ACGAAAATGCCCTCAGAAG (reverse), TLR-2: GAGCATCCGAATTGCATCACC (forward) and  
226 CCCAGAAGCATCACATGACAGAG (reverse), TLR-4: CATGGATCAGAACTCAGCAAAGTC  
227 (forward) and CATGCCATGCCTTGTCTTCA (reverse), and TLR-9: CAGCTAAAGGCCCTGACCAA  
228 (forward), and CCACCGTCTTGAGAATGTTGTG (reverse), plus the transcription factors NF- $\kappa$ B:  
229 CCGGGAGCCTCTAGTGAGAA (forward) and TCCATTTGTGACCAACTGAACGA (reverse),  
230 STAT3: TACCAGCCCTCCAATCAAAG (forward) and GGTCACACAGCACACAATCC, and SOCS3:  
231 CTGCAGGAGAGCGGATTCTACT (forward) and GCTGTGCGGGATAAGAAAGG (reverse). The  
232 tests were conducted in accordance with the manufacturer's specifications. Briefly, 1 $\mu$ g of the total RNA  
233 was used for cDNA synthesis. Reverse transcription (RT) was performed in a 200 $\mu$ L solution in the  
234 presence of 50mM Tris-HCl (pH 8.3), 3mM MgCl<sub>2</sub>, 10mM dithiothreitol, 0.5mM dNTPs, and 50ng  
235 random oligonucleotides with 200 units of reverse transcriptase (Invitrogen™). Reaction conditions  
236 were: 20 °C for 10 min, 42 °C for 45 min, and 95 °C for 5 min. A 7000-sequence detection system (ABI  
237 Prism, Applied Biosystems®) was used through the SYBRGreen kit (Applied Biosystems®) and the  
238 values obtained normalized against the internal control gene GAPDH: CGGATTTGGCCGTATTGGGC  
239 (forward) and TGATGGCATGCACTGTGGTC (reverse).

240

241

242

## 243 **2.11. Immunohistochemistry for NF- $\kappa$ B and STAT3 in lung tissue.**

244 For immunohistochemistry analysis, the paraffin-embedded sections of lung tissues were  
245 deparaffinized with xylene and then rehydrated. Section slides were incubated with 3% hydrogen  
246 peroxide for 10 min, then in 5% BSA in PBS blocking solution for 20 min, and after, incubated overnight  
247 with anti-NF- $\kappa$ B antibody (Cell signaling Technology) in blocking solution at 4 °C. After washing with  
248 PBS, the slides were treated with biotinylated secondary antibody for 20 min, streptavidin-HRP  
249 (horseradish peroxidase) for 20 min, and 3,3N-Diaminobenzidine Tetrahydrochloride for 10 min. The  
250 slides were then washed, and counter stained with hematoxylin. Slides were evaluated by microscopy,  
251 and the positive cells exhibited yellow or brown particles.

252

## 253 **2.12. Statistics**

254 The results were evaluated through the Analysis of Variance (ANOVA) and the Tukey-Kramer  
255 Multiple Comparison Test to determine the differences between the groups. The analysis were performed  
256 using Sigma Stat 3.1 software and graphs using GraphPad Prism 5.0 software. The results were  
257 considered significant when  $p < 0.05$ .

258

## 259 **3. Results**

### 260 **3.1. *Lactobacillus rhamnosus* attenuate the cigarette-induced airway** 261 **inflammation**

262 The analysis of cellular content in BALF revealed that in response to cigarette smoke, the COPD  
263 group presented with an increase in the total number of cells in the airways, in comparison to the control,  
264 non-smoking group (Figure 2A). In concordance with the characteristic inflammatory response observed  
265 in COPD manifestation, the infiltrating cells were constituted by macrophages (2B), neutrophils (2C), and

266 lymphocytes (2D). In contrast, it is possible to observe in the *Lr* group that probiotic feeding inhibited  
267 the influx of inflammatory cells into the airways. This phenomenon was accomplished by a significant  
268 attenuation in the levels of pro-inflammatory molecules (Figure 3). The exposure to cigarette smoke  
269 increased the levels of both pro-inflammatory cytokines, such as IL-1 $\beta$  (3A), IL-6 (3B), TNF- $\alpha$  (3C), KC  
270 (3D), IL-17 (3E), and TGF- $\beta$  (3J) in BALF, in comparison to control group. Controversially, the *Lr* group  
271 presented with a significant reduction in the levels of both pro-inflammatory cytokines and chemokines  
272 when compared with the COPD mice. For notice, the inflammatory response observed in the COPD  
273 group was correlated with a significant reduction in the levels of IL-10 (3K) in the airways, whereas in  
274 the *Lr* this anti-inflammatory cytokine is increased.

275

276 **Fig 2. Leukocyte lung infiltration.** After exposure of C57Bl/6 male mice to cigarette smoke and  
277 treatment with *Lactobacillus rhamnosus* (*Lr*), the total cells (2A) and inflammatory cells were counted  
278 ( $\times 10^5$ ) in BALF in millimeters by the morphometric evaluations of cytopsin preparations. Pulmonary  
279 inflammation was represented by the influx of specific leukocytes; neutrophil (2B), macrophage (2C), and  
280 lymphocytes (2D) in BALF fluid. All cell counts were obtained from the control, COPD and *Lr* + COPD  
281 groups. Each plot represents mean  $\pm$  SEM from 7 different animals. The experiments were performed in  
282 triplicate. Results were considered significant when  $p < 0.05$ .

283

284 **Fig 3. Cytokines and chemokines in BALF and SOCS3 in lung tissue.** The BALF obtained from  
285 control, COPD, and *Lr* + COPD groups was prepared for analysis of pro- and anti-inflammatory  
286 cytokines. The mediator's TNF (3A), IL-1 $\beta$  (3B), IL-6 (3C), IL-17 (3D), CXCL1 (3E), IL-10 (3F), TGF- $\beta$   
287 (3G) in BALF and SOCS3 (3H) in lung tissue were assayed by enzyme-linked immunosorbent assay  
288 (ELISA). Each plot represents mean  $\pm$  SEM from 7 different animals. The experiments were performed in  
289 triplicate. Results were considered significant when  $p < 0.05$

290

### 291 **3.2. *Lactobacillus rhamnosus* attenuates pulmonary remodeling.**

292 In concordance with the findings observed in the BALF, the COPD group presented with an  
293 inflammatory response in lung tissue (Figure 4), with marked influx of neutrophils into the parenchyma

294 (4A). Also, these animals exhibited signals characteristic of tissue remodeling as alveolar wall  
295 enlargement (4B), and collagen (4C) and elastic fibers deposition (4D).

296  
297 **Fig 4. Airway morphometry.** After exposure of C57Bl/6 male mice to cigarette smoke and treatment  
298 with *Lactobacillus rhamnosus* (*Lr*), sections (5  $\mu$ m) of formalin-fixed lungs were stained with  
299 hematoxylin and eosin for histological examination in control, COPD, and *Lr* + COPD groups. (Original  
300 magnification,  $\times 200$ ). (4A) Quantification of neutrophils in airway wall, (4B) Alveolar enlargement (Lm),  
301 (4C) Collagen fibers deposition, and (4D) Fiber elastics destruction were measured as described in  
302 Material and Methods section. Each plot represents mean  $\pm$  SEM from 7 different animals. Results were  
303 considered significant when  $p < 0.05$ .

304  
305 **3.3. *Lactobacillus rhamnosus* modulates the balance between**

306 **metalloproteases and tissue inhibitors of metalloproteases**

307 In COPD, pulmonary remodeling is correlated with the deregulation in the balance between MMP  
308 and its inhibitors (TIMP). The analysis of lung tissue by quantitative PCR revealed that CS inhalation  
309 induced a significant increase in the mRNA expression of both MMP-9 (5A) and MMP-12 (5B)  
310 accomplished by inhibition in the expression of the genes associated with TIMP-1 and TIMP-2 proteins  
311 (5C and 5D, respectively). On the other hand, oral feeding with *Lr* sustained the expression of the mRNA  
312 for MMP-9 and MMP-12 in levels comparable to those found in control animals, and partially restored  
313 the expression of both TIMP-1 and TIMP-2 genes.

314  
315 **Fig 5. Metalloproteases in lung tissue.** The mRNA expression of the MMP-9, MMP-12, TIMP-1 and  
316 TIMP-2 in lung from the control, COPD, and *Lr* + COPD groups is illustrated. After exposure of C57Bl/6  
317 male mice to cigarette smoke and treatment with *Lactobacillus rhamnosus* (*Lr*), the mRNA expression for  
318 MMP-9 (5A), MMP-12 (5B), TIMP-1 (5C), and TIMP-2 (5D) in lung tissue were evaluated through Real  
319 Time-PCR. The values were normalized by the GAPDH expression and expressed by arbitrary units.  
320 Each bar represents mean  $\pm$  SEM from 7 different animals. The experiments were performed in triplicate.  
321 Results were considered significant when  $p < 0.05$ .

322  
323

### 324 **3.4. *Lactobacillus rhamnosus* downregulates expression of STAT3** 325 **and NF- $\kappa$ B in lung tissue**

326 The activation of the STAT3 pathway and, consequently, the induction of NF- $\kappa$ B transcription factor  
327 regulate the expression of genes associated with inflammation in lung diseases and are correlated with  
328 disease severity. In concordance, inhalation of CS induced a significant increase in the mRNA expression  
329 of NF- $\kappa$ B and STAT3-related genes in lung tissue from COPD mice, in comparison to control group  
330 (Figures 6A and 6B, respectively). In contrast, the *Lr* group presented with a lower expression of these  
331 genes when compared to COPD mice, in levels similarly to those found in control group. These data were  
332 corroborated with immunohistochemical staining of lung tissue (Figure 6A and 6B).

333

334

335 **Fig 6. Transcription factors in lung tissue.** The mRNA expression of the NF- $\kappa$ B and STAT3 in lung  
336 from the control, COPD, and *Lr* + COPD groups is illustrated. After exposure of C57Bl/6 male mice to  
337 cigarette smoke and treatment with *Lactobacillus rhamnosus* (*Lr*), the mRNA expression for NF- $\kappa$ B (6A)  
338 and STAT3 (6B) in lung tissue were evaluated through Real Time-PCR. The values were normalized by  
339 the GAPDH expression and expressed by arbitrary units. For immunohistochemical localization of NF-  
340  $\kappa$ B and STAT3 in lung tissue of mice from control, COPD and *Lr* + COPD groups, the positive reaction  
341 was visualized as a yellowish-brown stain. Each plot represents mean  $\pm$  SEM from 7 different animals.  
342 Results were considered significant when  $p < 0.05$ .

343

### 344 **3.5. The beneficial effect of *Lactobacillus rhamnosus* is associated** 345 **with a reduction in the expression of Toll-like receptors in lungs**

346 Because TLR engagement plays an important role in COPD pathogenesis, we decided to determine the  
347 status of mRNA expression to different TLRs in our model. Figure 7 demonstrates that among the TLR  
348 studied, the expression of mRNA for TLR2 (7A), TLR4 (7B), and TLR9 (7C) increased in cigarette  
349 smoke challenged-mice compared to control group. On the other hand, the treatment with *Lr* reduced the  
350 expression of induced a significant reduction in these genes in comparison with COPD group.

351

352 **Fig 7. Toll-like receptors in lung tissue.** After exposure of C57Bl/6 male mice to cigarette smoke and  
353 treatment with *Lactobacillus rhamnosus* (*Lr*), the mRNA expression for TLR2 (7A), TLR4 (7B) and  
354 TLR9 (7C) in lung tissue of control, COPD and *Lr* + COPD groups was evaluated through Real Time-  
355 PCR. The values were normalized by the GAPDH expression and expressed by arbitrary units. Each bar  
356 represents mean  $\pm$  SEM from 7 different animals. The experiments were performed in triplicate. Results  
357 were considered significant when  $p < 0.05$ .

358

### 359 **3.6. *Lactobacillus rhamnosus* modulates the secretion of** 360 **inflammatory mediators in murine bronchial epithelial cells**

361 The airway epithelium is central to the pathogenesis of COPD. Therefore, we investigated the  
362 secretion of cytokines and chemokines from murine bronchial epithelial cells stimulated with CSE,  
363 treated with *Lr*, or stimulated with CSE and treated with *Lr*. As shown in figure 8, the secretion of TNF  
364 (8A), IL-1 $\beta$  (8B), IL-6 (8C), CXCL1 (8D), from CSE-bathed murine bronchial epithelial cells increased  
365 compared to control group. On the contrary, the CSE-exposed murine bronchial epithelial cells secreted  
366 lower levels of IL-10 (8E), TGF $\beta$  (8F) as well as SOCS3 (8G) than murine bronchial epithelial cells from  
367 control group. The pre-incubation with *Lr* probiotic inhibited the secretion of all cytokines, with  
368 exception of SOCS3, TGF $\beta$  and IL-10, which were upregulated, even in comparison to control group.

369

370 **Fig 8. Murine bronchial epithelial cells.** Cytokines and chemokines secretion from murine bronchial  
371 epithelial cells of control and COPD groups and treated with *Lr* 1 hour before addition of CSE is  
372 illustrated in figure 8. The inflammatory mediator's TNF (8A), IL-1 $\beta$  (8B), IL-6 (8C), CXCL1 (8D), IL-  
373 10 (8E), TGF- $\beta$  (8F) and SOCS3 (8G) in supernatant of murine bronchial epithelial cells were assayed by  
374 enzyme-linked immunosorbent assay (ELISA). The assays were performed in triplicate Results were  
375 considered significant when  $p < 0.05$ .

376

377

378

### 379 **3.7. *Lactobacillus rhamnosus* modulates the secretion of** 380 **inflammatory mediators in human bronchial epithelial cells (BEAS).**

381 We investigated the secretion of cytokines and chemokines from human bronchial epithelial cells  
382 (BEAS) stimulated with CSE or stimulated with CSE and treated with *Lr*. As shown in figure 9, the  
383 secretion of TNF (9A), IL-1 $\beta$  (9B), IL-6 (9C), and CXCL8 (9D) from CSE-bathed BEAS cells increased  
384 compared to control group. On the other hand, CSE-exposed BEAS cells secreted lower levels of IL-10  
385 (9E) as well as TGF $\beta$  (9F) compared to control group. The same effect was observed with levels of  
386 SOCS3 (9G) The presence of probiotic in BEAS cell culture stimulated with CSE markedly inhibited the  
387 secretion of all cytokines investigated herein, with exception of SOCS3, TGF $\beta$  and IL-10, which were  
388 upregulated in comparison to control cells.

389  
390 **Fig 9. Human bronchial epithelial cells (BEAS).** Cytokines and chemokines secretion from BEAS cells  
391 stimulated with CSE and treated with *Lr* are illustrated in figure 9. The inflammatory mediator's TNF  
392 (9A), IL-1 $\beta$  (9B), IL-6 (9C), CXCL8 (9D), IL-10 (9E), TGF $\beta$  (9F) and SOCS3 (9G) in supernatant of  
393 human bronchial epithelial cells were assayed by enzyme-linked immunosorbent assay (ELISA). The  
394 assays were performed in triplicate. Results were considered significant when  $p < 0.05$ .

395

### 396 **3.8. *Lactobacillus rhamnosus* downregulates NF- $\kappa$ B, STAT3 and** 397 **SOCS3 in murine bronchial epithelial cells and in BEAS cells.**

398 The *in vivo* findings indicated that the anti-inflammatory effects of *Lr* treatment was associated  
399 with the modulation of the genes associated with NF $\kappa$ B and STAT3 pathways (Figure 10). In  
400 concordance, both the murine bronchial epithelial cells (10A and 10B) and human bronchial epithelial  
401 cells (10C and 10D) cells presented with increased expression of mRNA to NF- $\kappa$ B and STAT3 genes  
402 upon exposure to CSE, in comparison to control cells. The *Lr* treatment maintained the expression of  
403 these genes at levels similar to those observed in the control cells, corroborating the notion that the  
404 beneficial effects associated with the probiotic involves the control of the STAT3 pathway. On the  
405 contrary, both the murine bronchial epithelial cells (10C) and the BEAS cells (10F) stimulated with CSE



406 presented a level lower of SOCS3 compared to control group. The oral feeding with *Lr* restored the  
407 SOCS3 levels in murine bronchial cells as well as in BEAS cells to values similar to control. STAT3 and  
408 NFκB pathways are regulated by molecules such as SOCS3, which lower levels has been associated with  
409 COPD.

410

411

412 **Fig 10. Transcription factors in murine bronchial epithelial cells and in BEAS.** The mRNA  
413 expression of the NF-κB, STAT3 as well as SOCS3 in murine bronchial epithelial cells from the control,  
414 COPD, and *Lr* + COPD groups is illustrated in figure 10A, 10B and 10C, respectively. Figures 10D, 10E  
415 and 10F presents the mRNA expression of the NF-κB, STAT3 as well as SOCS3 in human bronchial  
416 epithelial cells (BEAS) from the control, COPD, and *Lr* + COPD groups. After exposure of both airway  
417 epithelial cells, murine and human, to cigarette smoke extract (CSE) and treatment with *Lactobacillus*  
418 *rhamnosus* (*Lr*), the mRNA expression for NF-κB, STAT3 and SOCS3 in lung tissue was evaluated  
419 through Real Time-PCR. The values were normalized by the GAPDH expression and expressed by  
420 arbitrary units. The assays were performed in triplicate. Results were considered significant when  $p <$   
421 0.05.

422

## 423 **4. Discussion**

424 The present study demonstrates the ability of the probiotic *Lactobacillus rhamnosus* (*Lr*) to  
425 control lung inflammation in cigarette smoke (CS)-induced COPD experimental model. *Lr* feeding  
426 attenuated both the migration of inflammatory cells to the lung and tissue remodeling features, such as  
427 alveolar enlargement and exacerbated deposition of collagen and mucus secretion. Although the  
428 mechanisms involved in this phenomenon remain an object of study, the probiotic mitigated the cytokine  
429 storm associated with COPD pathogenesis, maintaining the equilibrium between transcription factors that  
430 regulate the production of pro and anti-inflammatory molecules.

431 Our findings corroborate previous studies showing that that CS inhalation induces a robust migration of  
432 inflammatory cells to the lung environment, mainly macrophage and neutrophils [41-43]. In response to  
433 CS, pulmonary cells produced pro-inflammatory cytokines such as IL-1β, IL-6 and TNF-α resulting in the  
434 secretion of several chemokines. The increase in CXCL1 levels promotes the migration and

435 differentiation of monocytes in lung tissue, amplifying the inflammatory process [44-46]. The chronic  
436 inflammation of the lungs results in alterations in the parenchyma architecture, a process known as tissue  
437 remodeling, due an unbalance between active MMPs and its inhibitors, TIMP [47, 48]. In concordance  
438 with this notion, CS group presented, in association with pulmonary neutrophilia, alveolar enlargement as  
439 well as loss of alveolar parenchyma, collagen deposition, and destruction of elastic fibers. These  
440 structural alterations were accomplished by a significant increase in the mRNA expression for MMP-9  
441 and MMP-12 that was inversely to gene expression for TIMP-1 and TIMP-2. Despite the  
442 cytokine/chemokine storm and the consequent cascade of events induced by CS inhalation, probiotic  
443 feeding attenuated the inflammatory process both in the airways space and lung parenchyma.  
444 Although the mechanisms behind this effect are allusive, we found that *Lr* feeding increased both the  
445 levels of IL-10 in the BALF and SOCS3 in lung tissue, even when compared to control animals,  
446 indicating that probiotic induced an anti-inflammatory steady state. This idea is corroborated by the fact  
447 that *Lr* feeding sustained the levels of mRNA for TLRs, one of the major players in CS-induced COPD,  
448 and for pro-inflammatory transcription factors, such as NFκB and STAT3, at levels comparable to those  
449 from control animals.

450 Because epithelial cells are the interface between innate and adaptive immunity and a growing body of  
451 evidence supports a major role for non-immune pulmonary cells in COPD [51-53], we decided to study  
452 the response of epithelial cells to probiotic stimulation. The exposure of murine or human epithelial cells  
453 to cigarette extract (CSE) resulted in the secretion of several pro-inflammatory cytokines and chemokines  
454 and induced expression of mRNA to STAT3 and NFκB, mirroring the observed in the *in vivo* model. In  
455 contrast, probiotic stimulation made the epithelial cells refractory to the inflammatory provocation  
456 provided by CE.

457 The proposal of action mechanism for *Lr* effect in which the bronchial epithelium is the important target  
458 was confirmed when the probiotic modulated the secretion of pro- and anti-inflammatory cytokines in  
459 human bronchial epithelial cells stimulated with CSE. Moreover, our results show that the anti-  
460 inflammatory effect of *Lr* on cytokines secretion from CSE-exposed human bronchial epithelial cells was  
461 due to the downregulation of both transcription factors, NF-κB and STAT3. The modulation of  
462 transcription factors SOCS3 and STAT3 by probiotic was also observed in human bronchial epithelial  
463 cells. This reinforces the idea that the *in vivo* action mechanism of *Lr* involves the signaling pathway NF-

464  $\kappa$ B/STAT3/SOCS3 in human bronchial epithelium cells in order to attenuate both the lung inflammation  
465 and the exacerbation of immune response in lung microenvironment.  
466 Finally, several strains of *Lactobacillus*, as well as its structural components, and microbial-produced  
467 metabolites can stimulate epithelial cell signaling pathways which can prevent cytokine and oxidant-  
468 induced epithelial damage thereby promoting cell survival through increased production of cytoprotective  
469 molecules [54]. Our results demonstrated that *Lr*, by itself, increased secretion of both the IL-10 and the  
470 TGF- $\beta$  secretion as well as SOCS3 levels in human bronchial epithelial cells unstimulated with CSE,  
471 which supports the idea that daily supplementation with probiotic may protect the lung milieu through of  
472 airway epithelial cells, since the IL-10 can suppress pro-inflammatory genes and the TGF- $\beta$  can guarantee  
473 the integrity of airway epithelial barrier.  
474 In conclusion, the present manuscript describes by the first time that *Lr* modulates the secretion of pro-  
475 and anti-inflammatory molecules from human airway epithelial cells through of restoring the equilibrium  
476 between the transcription factors NF- $\kappa$ B/STAT-3 and SOCS3, and it seems to be an important action  
477 mechanism of probiotic in order to control lung inflammation as well as airway remodeling in COPD.

478

## 479 **5. References**

- 480 [1] Hou WR, Hou YL, Wu GF, Song Y, Su XL, Sun B, et al. cDNA, genomic sequence cloning and  
481 overexpression of ribosomal protein gene L9 (rpL9) of the giant panda (*Ailuropoda melanoleuca*). *Genet*  
482 *Mol Res.* 2011;10: 1576-1588.
- 483 [2] Global Strategy for the Diagnosis, Management, and prevention of Chronic Obstructive Pulmonary  
484 Disease. 2019.
- 485 [3] D.D. Wu, J. Song, S. Bartel, S. Krauss-Etschmann, M.G. Rots, M.N. Hylkema. The potential for  
486 targeted rewriting of epigenetics marks in COPD as a new therapeutic approach. *Pharmacology &*  
487 *Therapeutics.* 17 (2017) 30217-30226.
- 488 [4] T.J. Haw, M.R. Starkey, S. Pavlidis, M. Fricker, A.L. Arthurs, P.M. Nair, et al. Tolle-like receptor 2  
489 and 4 opposing roles in the pathogenesis of cigarette smoke-induced chronic obstructive pulmonary  
490 disease. *Am J Physiol Lung Cell Mol Physiol.* (2017).

494

495 [5] P. J. Barnes. Cellular and molecular mechanisms of Ashtma and COPD. *Clinical Science*. 131 (2017)

496 1541-1558.

497

498 [6] M.K. Han, A. Agusti, P.M. Calverley, B.R. Celli, G. Criner, J.L. Curtis, et al. Chronic Obstructive

499 Pulmonary Disease phenotypes. *Am J Respir Crit Care Med*.182 (2010) 598-604.

500

501 [7] C.M. Freeman, F.J. Martinez, M.K. Han, G.R. Washko Jr, A.L. McCubrey, S.W. Chensue, et al. Lung

502 CD8+ T cells in COPD have increased expression of bacterial TLRs. *Respiratory Research*. 14 (2013) 1-

503 13.

504

505 [8] R.M Tuder, I. Petrache. Pathogenesis of Chronic Obstructive Pulmonary Disease. *The Journal of*

506 *Clinical Investigation*. 122 (2012) 2749-2755

507

508 [9] M.C. Lebre, T. Burwell, P.L. Vieira, J. Lora, A.J. Coyle, M.L. Kapfenberg, et al. Differential

509 expression of inflammatory chemokines by Th1- and Th2-cell promoting dendritic cells: a role for

510 different mature dendritic cell populations in attracting appropriate effector cells to peripheral sites of

511 inflammation. *Immunology and Cell Biology*. 83 (2005) 525-535.

512

513 [10] J. Pons, J. Sauleda, V. Regueiro, C. Santos, M. Lopez, J. Ferrer, et al. Expression of toll-like receptor

514 2 is up regulated in monocytes from patients with chronic obstructive pulmonary disease. *Respiratory*

515 *Research*. 107 (2006) 1-9

516

517 [11] J.L Simpson T.V. Grissel, J. Douwes, R.J. Scott, M.J. Boyle, P.G. Gibson. Innate immune activation

518 in neutrophilic asthma and bronchiectasis. *Thorax*. 62 (2007) 211-218.

519

520 [12] P.M. Hansbro, T.J. Haw, M.R. Starkey, K. Miyake. Toll-like receptors in COPD. *Eur Respir J*. 49

521 (2017) 1-3.

522

523 [13] R.F. Foronjy, M.A. Salathe, A.J. Dabo, N. Baumlin, N. Cummins, N. Eden, et al. TLR9 expression is

524 required for the development of cigarette smoke-induced emphysema in mice. *Am J Physiol Lung Cell*

525 *Mol Physiol*. 311 (2016) 154-166.

526

- 527 [14] C.M. Freeman, J.L. Curtis, S.W. Chensue. CC chemokine receptor 5 and CXC chemokine receptor 6  
528 expression by lung CD8+ cells correlate with Chronic Obstructive Pulmonary Disease severity. The  
529 American Journal of Pathology. 171 (2007) 767-776.
- 530  
531 [15] W. Gao, L. Lingling, Y. Wang, S. Zhang, I.M. Adcock, P.J. Barnes, et al. Bronchial epithelial cells:  
532 the key effector cells in the pathogenesis of chronic obstructive pulmonary disease? *Respirology*. 20  
533 (2015) 722-729.
- 534  
535 [16] Z. Navratilova, V. Kolek, M. Petrek. Matrix metalloproteinase and their inhibitors in chronic  
536 obstructive pulmonary disease. *Arch Immunol Ther Exp*. 64 (2016) 177-193.
- 537  
538 [17] R. Chadhuri, C. McSharry, M. Spears, J. Brady, C. Grierson, C.M. Messow, et al. Sputum matrix  
539 metalloproteinase-9 is associated with the degree of emphysema on computed tomography in COPD.  
540 *Translational Respiratory Medicine*. 1 (2013) 1-5.
- 541  
542 [18] A. Noguera, C. Gomez, R. Faner, B. Cosio, A. Gonzalez-Periz, J. Claria, et al. An investigation of  
543 the resolution of inflammation (catabasis) in COPD. *Respiratory Research*. 13 (2012) 1-9.
- 544  
545 [19] S. Kwiatkowska, K. Noweta, M. Zieba, D. Nowak, P. Bialasiewicz. Enhanced exhalation of matrix  
546 metalloproteinase-9 and tissue inhibitor of metalloproteinase-1 in patients with COPD exacerbation: a  
547 prospective study. *Respiration*. 84 (2012) 231-241.
- 548 [20] N. Nasreen, L. Gonzalves, S. Peruvemba, K.A. Mohammed. Fluticasone furoate is more effective  
549 than mometasone furoate in restoring tobacco smoke inhibited SOCS-3 expression in airway epithelial  
550 cells. *Int Immunopharmacol*. 19 (2014) 153-160.
- 551  
552 [21] C.M. Prelê, E. Yao, R.J. O'Donogue, S.E. Mutsaers, D.A. Knight. Stat3: a central mediator of  
553 pulmonary fibrosis? *Proc Am Thor Soc*. 9 (2012) 177-182.
- 554  
555 [22] A.R. Almeida-Oliveira, J.C.J Aquino-Junior, A. Abbasi, A. Santos-Dias, M.C. Oliveira-Junior, R.W.  
556 Alberca-Custodio, et al. Effects of aerobic exercise on molecular aspects of asthma: involvement of  
557 SOCS-JAK-STAT. *Exercise Immunology Review*. 25 (2019) 50-62.
- 558

- 559 [23] S. McCormick, N. Gowda, J.X. Fang, N.M. Heller. Suppressor of cytokine signaling (SOCS)1  
560 regulates interleukin-4 (IL-4)-activated insulin receptor substrate (IRS)-2 tyrosine phosphorylation in  
561 monocytes and macrophages via the proteasome. *J Biol Chem.* 291 (2016) 20574-20587.
- 562  
563 [24] H. Shoda, A. Yokoyama, R. Nishino, T. Nakashima, N. Ishikawa, Y. Haruta, et al. Overproduction  
564 of collagen and diminished SOCS1 expression are causally linked in fibroblasts from idiopathic  
565 pulmonary fibrosis. *Biochem Biophys Res Commun.* 353 (2007) 1004-1010.
- 566  
567 [25] A. Apostolou, T. Kerenidi, A. Michopoulos, K.I. Gourgoulianis, M. Noutsias, A.E. Germenis, et al.  
568 Association between TLR2/TLR4 gene polymorphisms and COPD phenotype in a Greek cohort. *Herz.* 8  
569 (2016) 1-6.
- 570  
571 [26] E. Mortaz, I.M. Adcock, K. Ito, A.D. Kraneveld, F.P. Nijkamp, G. Folkerts. Cigarette smoke induces  
572 CXCL8 production by human neutrophils via activation of TLR9 receptor. *Eur Respir J.* 36 (2010) 1143-  
573 1154.
- 574  
575 [27] E. Mortaz, I.M. Adcock, F.L. Ricciardolo, M. Varahram, H. Jamaati, A.A. Velayati, G, et al. Anti-  
576 Inflammatory Effects of *Lactobacillus Rahnmosus* and *Bifidobacterium Breve* on Cigarette Smoke  
577 Activated Human Macrophages. *PLoS One.* 10 (2015) e0136455.
- 578  
579 [28] L. Zuo, K. Lucas, C.A. Fortuna, C.C. Chuang, T.M. Best. Molecular Regulation of Toll-like  
580 Receptors in Asthma and COPD. *Front Physiol.* 9 (2015) 312-315.
- 581  
582 [29] T.A. Bhat, L. Panzica, S.G. Kalathil, Y. Thanavala. Immune Dysfunction in Patients with Chronic  
583 Obstructive Pulmonary Disease. *Ann Am Thorac Soc.* 12 (2015) S169-S175.
- 584  
585 [30] G.G. Brusselle, G.F. Joos, K.R. Bracke. New insights into the immunology of chronic obstructive  
586 pulmonary disease. *Lancet.* 378 (2011) 1015-1026.
- 587  
588 [31] M.A. Ponce-Gallegos, A. Ramirez-Venegas, R. Falfan-Valencia. Th17 profile in COPD  
589 exacerbations. *International Journal of COPD.* 12 (2017) 1857-1865.
- 590

- 591 [32] G. Westergreen-Thorsson, M. Bagher, A. Andersson-Sjoland, L. Thiman, C.G. Lofdahl, O. Hallgren,  
592 et al. VEGF synthesis is induced by prostacyclin and TGF- $\beta$  in distal lung fibroblasts from COPD  
593 patients and control subjects: implications for pulmonary vascular remodeling. *Respirology*. 32 (2017) 1-  
594 8.
- 595  
596 [33] J.C. Hogg. Pathophysiology of airflow limitation in chronic obstructive pulmonary disease. *The*  
597 *Lancet*. 364 (2004) 709-721.
- 598  
599 [34] G.T. Motz, B.L. Eppert, S. Guangyun, S.C. Wesselkamper, M.J. Linke, R. Deka, et al. Persistence of  
600 lung CD8 T cell oligoclonal expansions upon smoking cessation in a mouse model of cigarette smoke-  
601 induced emphysema. *The Journal of Immunology*. 181 (2008) 8036-8043.
- 602  
603 [35] N. Hirota, J.G. Martin. Mechanisms of airway remodeling. *Chest*. 144 (2013) 1026-1032.
- 604  
605 [36] J.L. López-Campos, W. Tan, J.B. Soriano. Global burden of COPD. *Respirology*. 21 (2016) 14-23.
- 606  
607 [37] L.M. Rocha-Ramirez, R.A. Pérez-Solano, S.L. Castanon-Alonso, S.S.M Guerrero, A.R. Pacheco,  
608 M.G. Garibay, et al. Probiotic *Lactobacillus* strains stimulate the inflammatory response and activate  
609 human macrophages. *Journal of Immunology Research*. 5 (2017) 1-14.
- 610  
611 [38] P. Forsythe. Probiotics and lung diseases. 139 (2011) 901-908.
- 612  
613 [39] T. Kamiya, L. Wang, P. Forsythe, G. Goettsche, Y. Mao, Y. Wang, et al. Inhibitory effects of  
614 *Lactobacillus reuteri* on visceral pain induced by colorectal distension in Sprague-Dawley rats. *Gut*. 55  
615 (2006) 191-196.
- 616  
617 [40] E.F. Verdú, P. Bercik, G.E. Bergonzelli et al. *Lactobacillus paracasei* normalizes muscle  
618 hypercontractility in a murine model of postinfective gut dysfunction. *Gastroenterology*. 127 (2004) 826-  
619 837.
- 620  
621 [41] A.V. Rao, T.M. Bested, T.M. Beaulne, M.A. Katzman, C. Iorio, J.M Berardi, et al. *Gut Pathog*. 1  
622 (2019) 6-10.
- 623

- 624 [42] S.D. Pouwels, G.J. Zijlstra, M. Van der Toorn, L. Hesse, R. Gras, N.H.T. Hacken, et al. Cigarette  
625 smoke-induced necroptosis and DAMP release trigger neutrophilic airway inflammation in mice. *Am J*  
626 *Physiol Lung Cell Mol Physiol.* 310 (2016) 377-386.
- 627  
628 [43] K. Kruger, G. Dischereit, M. Seimetz, J. Wilhelm, N. Weissmann, F.C. Mooren. Time course of  
629 cigarette smoke-induced changes of systemic inflammation and muscle structure. *Am J Physiol Lung Cell*  
630 *Mol Physiol.* 309 (2015) 119-128.
- 631  
632 [44] K.H. Lee, J. Jeong, Y.J. Koo, A.H. Jang, C.H. Lee, C.G. Yoo. Exogenous neutrophil elastase enters  
633 bronchial epithelial cells and suppresses cigarette smoke extract-induced heme oxygenase-1 by cleaving  
634 sirtuin 1. *J Biological Chemistry.* 33 (2017) 11-13.
- 635  
636 [45] M. Bazett, A. Biala, R.D. Huff, M.R. Zeglinksi, P.M. Hansbro, M. Bosiljcic, et al. Attenuating  
637 immune pathology using a microbial-based intervention in a mouse model of cigarette smoke-induced  
638 lung inflammation. *Respir Res.* 18 (2017) 92-95.
- 639  
640 [46] C. Costa, R. Rufino, S.L. Traves, J.R. Lapa Silva, P.J. Barnes, L.E. Donnelly. CXCR3 and CCR5  
641 chemokines in induced sputum from patients with COPD. *Chest.* 133 (2008) 26-33.
- 642  
643 [47] T. Inui, M. Watanabe, K. Nakamoto, M. Sada, A. Hirata, M. Nakamura, et al. Bronchial epithelial  
644 cells produce CXCL1 in response to LPS and TNF $\alpha$ : A potential role in the pathogenesis of COPD. *Exp*  
645 *Lung Res.* 44 (2018) 323-331.
- 646  
647 [48] W. Hao, M. Li, Y. Zhang, C. Zhang, Y. Xue. Expressions of MMP-12, TIMP-4, and Neutrophil  
648 Elastase in PBMCs and Exhaled Breath Condensate in Patients with COPD and Their Relationships with  
649 Disease Severity and Acute Exacerbations. *J Immunol Res.* 17 (2019) 714-718.
- 650  
651 [49] Z. Navratilova, V. Kolek, M. Petrek. Matrix Metalloproteinases and Their Inhibitors in Chronic  
652 Obstructive Pulmonary Disease. *Arch Immunol Ther Exp (Warsz).* 64 (2016) 177-193.
- 653  
654 [50] J.T. Ito, D.A.B. Cervilha, J.D. Lourenço, N.G. Gonçalves, R.A. Volpini, E.G. Caldini, et al.  
655 Th17/Treg imbalance in COPD progression: A temporal analysis using a CS-induced model. *PLoS One.*  
656 14 (2019): e0209351.



657

658 [51] D.A.B. Cervilha, J.T. Ito, J.D. Lourenço, C.R. Olivo, B.M. Saraiva-Romanholo, R.A. Volpini, et al.

659 The Th17/Treg Cytokine Imbalance in Chronic Obstructive Pulmonary Disease Exacerbation in an

660 Animal Model of Cigarette Smoke Exposure and Lipopolysaccharide Challenge Association.. *Sci Rep.* 13

661 (2019) 1921-1923.

662

663 [52] V. De Rose, K. Molloy, S. Gohy, C. Pilette, C.M. Greene. Airway epithelium dysfunction in cystic

664 fibrosis and COPD. *Mediators of Inflammation.* 21 (2018); 1-20.

665

666 [53] P.S. Hiemstra, P.B. McCray Jr, R. Bals. The innate immune function of airway epithelial cells in

667 inflammatory lung disease. *Eur Respir J.* 45 (2015) 1150-1162.

668

669 [54] I.H. Heijink, S.M. Brandenburg, D.S. Postma, A.J.M. van Oosterhout. Cigarette smoke impairs

670 airway epithelial barrier function and cell-cell contact recovery. *Eur Respir J.* 29 (2012) 419-428.

671

672 [55] K.Y. Sun, D.H. Xu, C. Xie, S. Plummer, J. Tang, X.F. Yang, X.H. Ji. *Lactobacillus paracasei*

673 modulates LPS-induced inflammatory cytokine release by monocyte-macrophages via the up-regulation

674 of negative regulators of NF-kappaB signaling in a TLR2-dependent manner. *Cytokine.* 92 (2017) 1-11.

Figure 2

(2A)

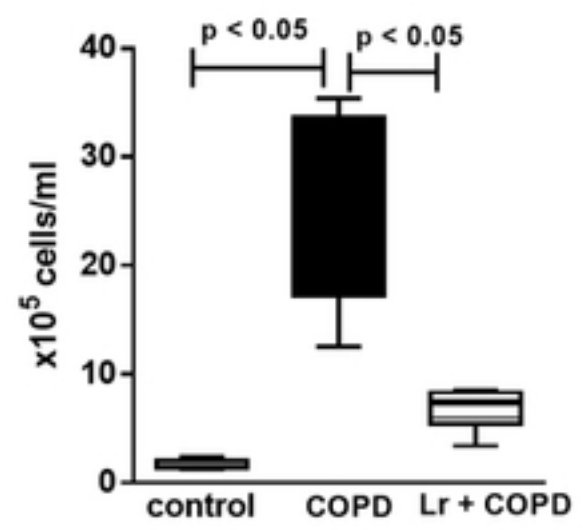

(2B)

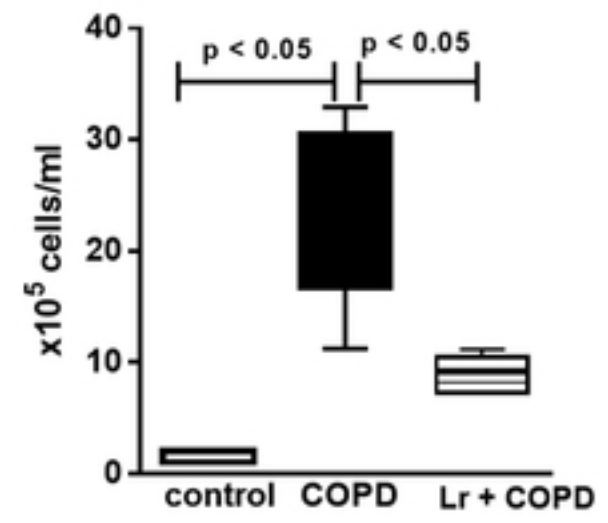

(2C)

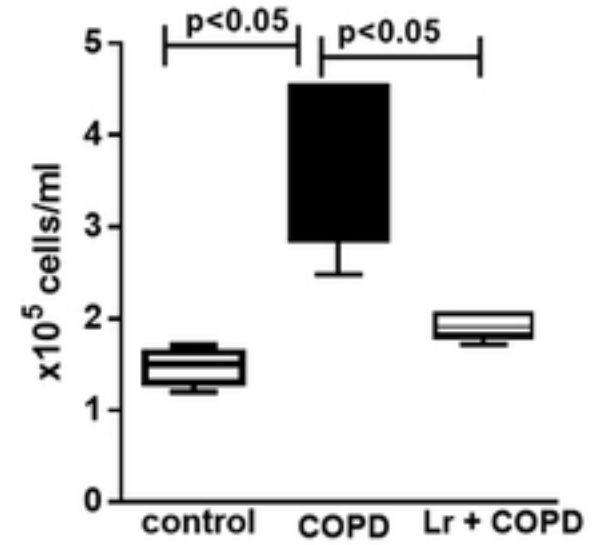

(2D)

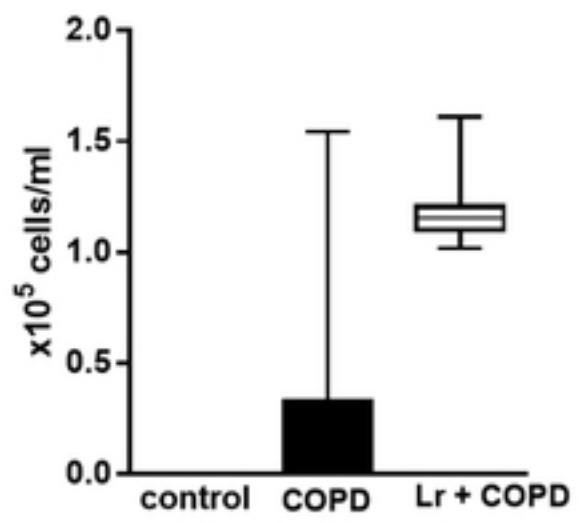

Figure 2

Figure 3

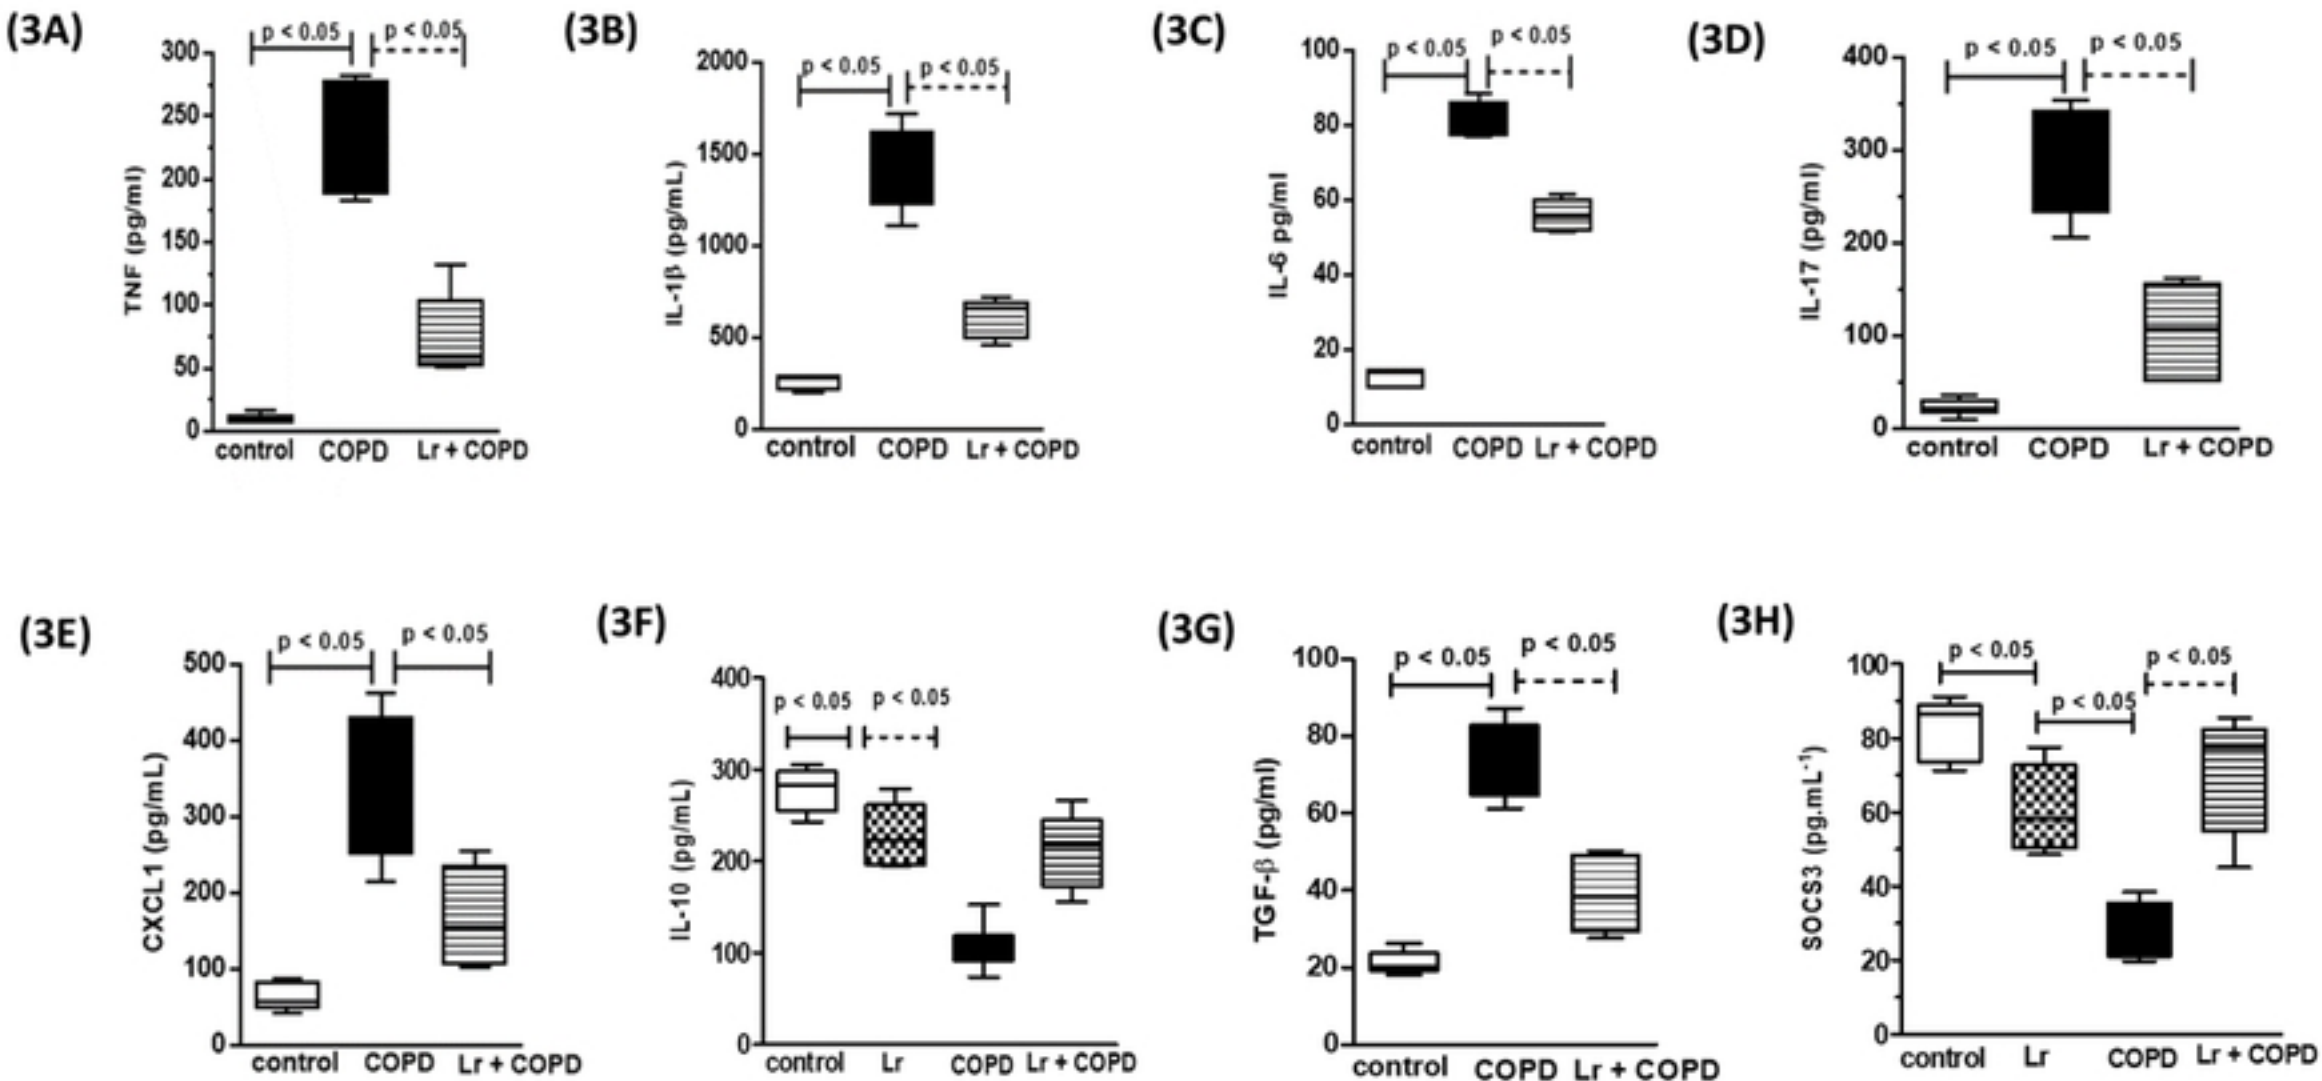

Figure 3

**Control****COPD****Lr + DPOC**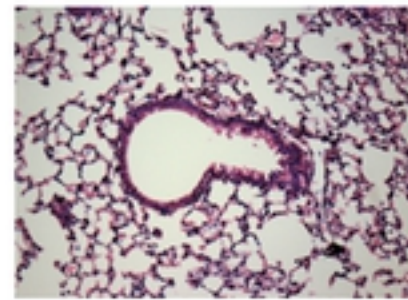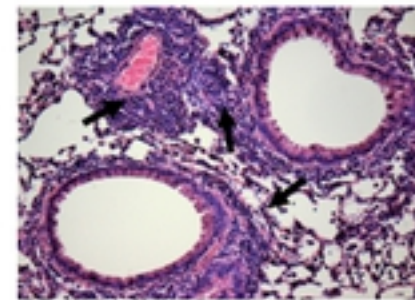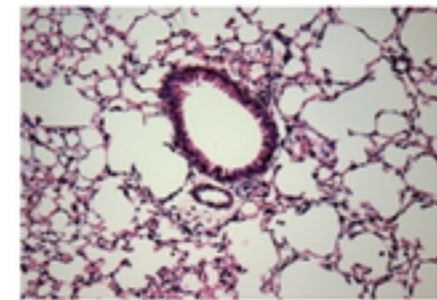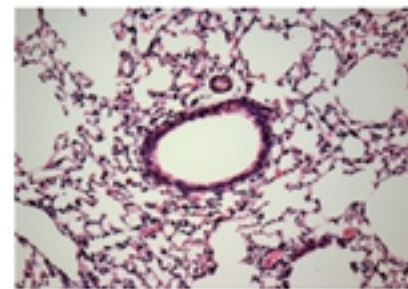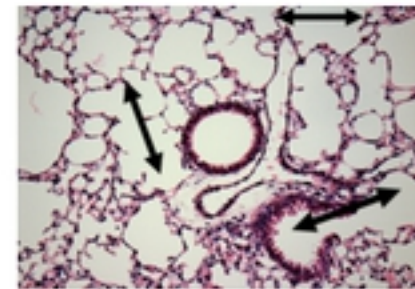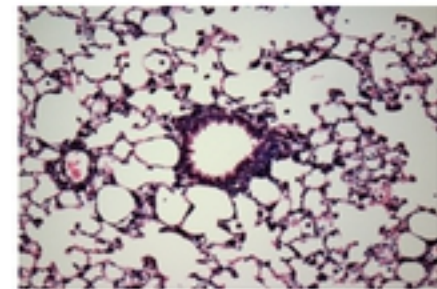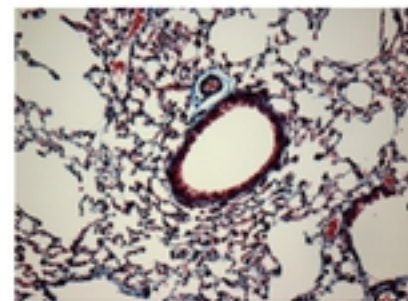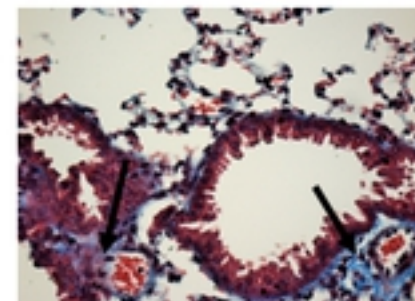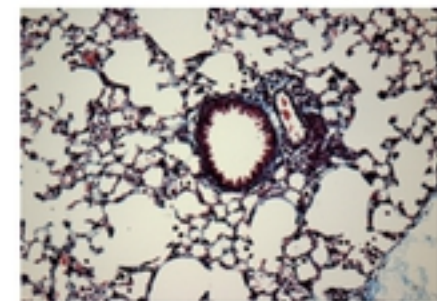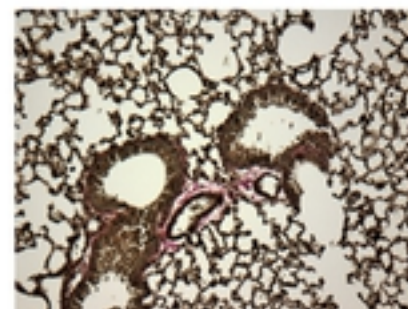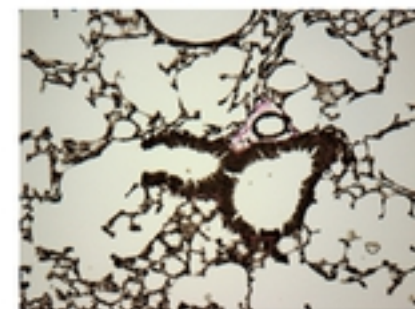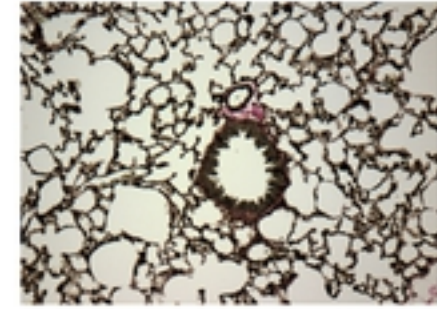**Figure 4****(4A)**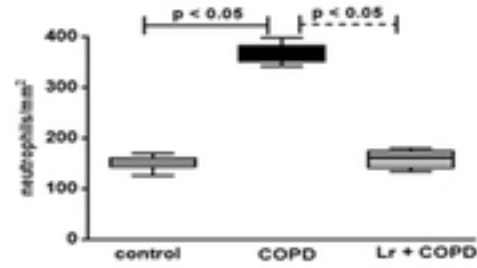**(4B)**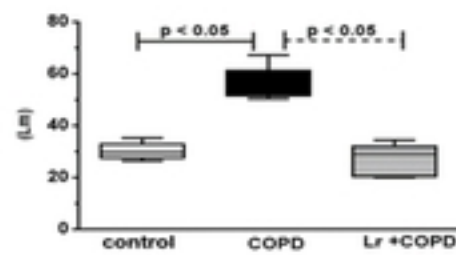**(4C)**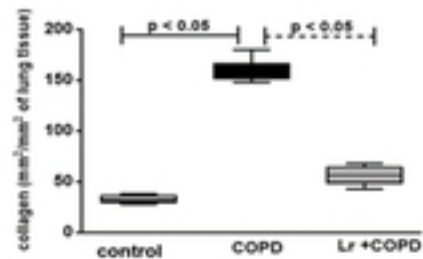**(4D)**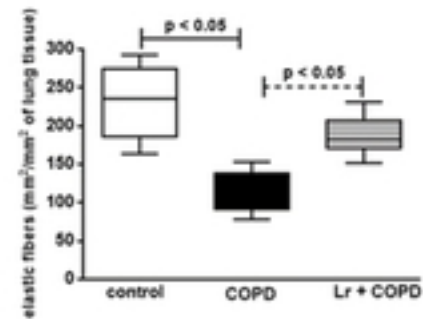**Figure 4**

Figure 5

(5A)

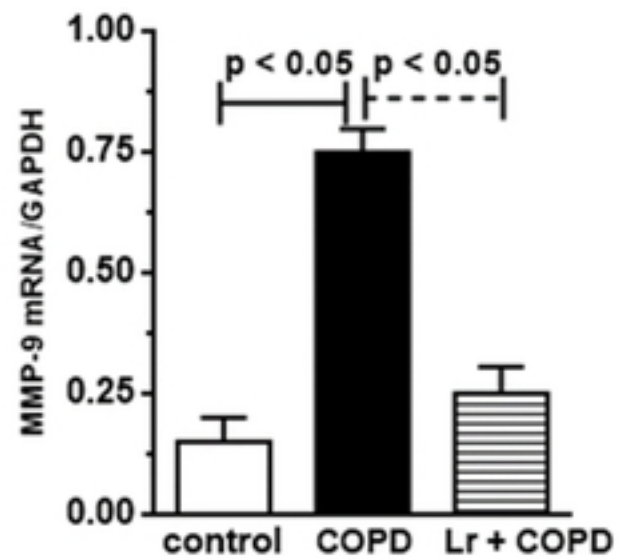

(5B)

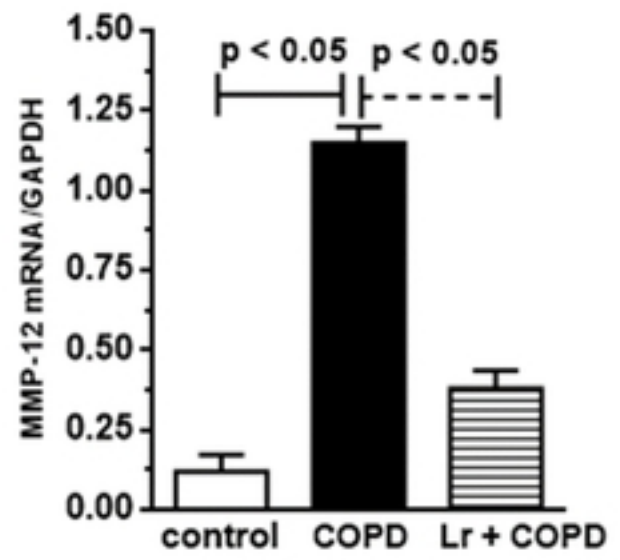

(5C)

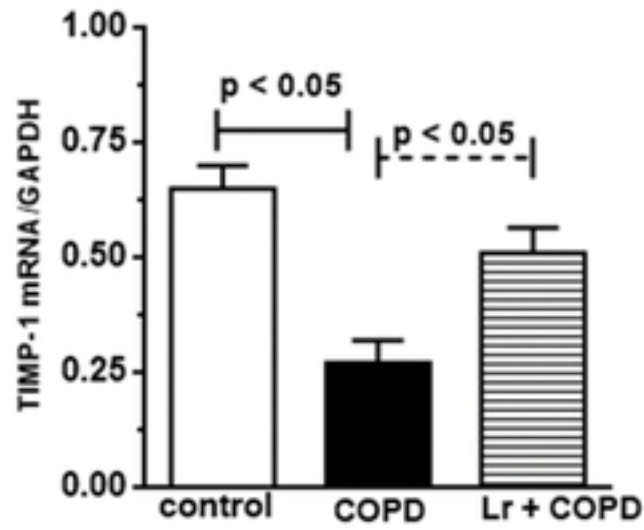

(5D)

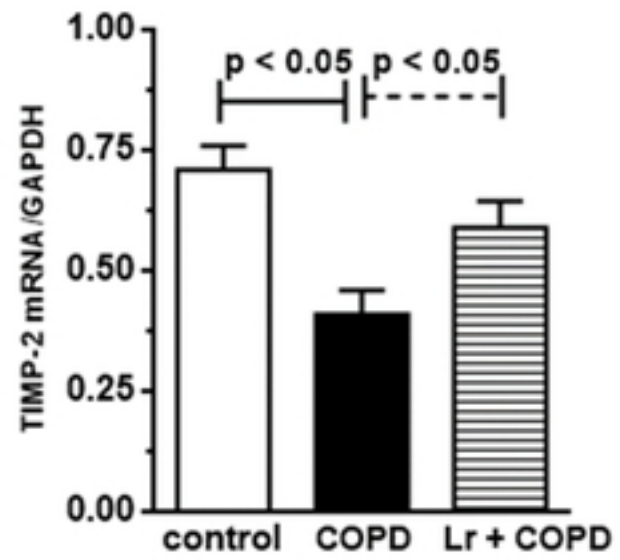

Figure 5

Figure 6

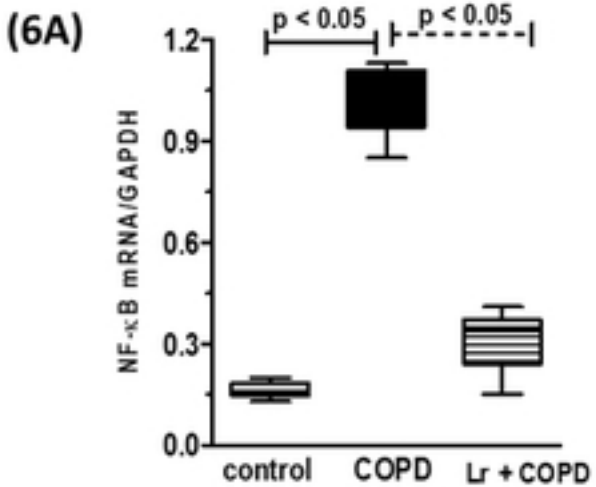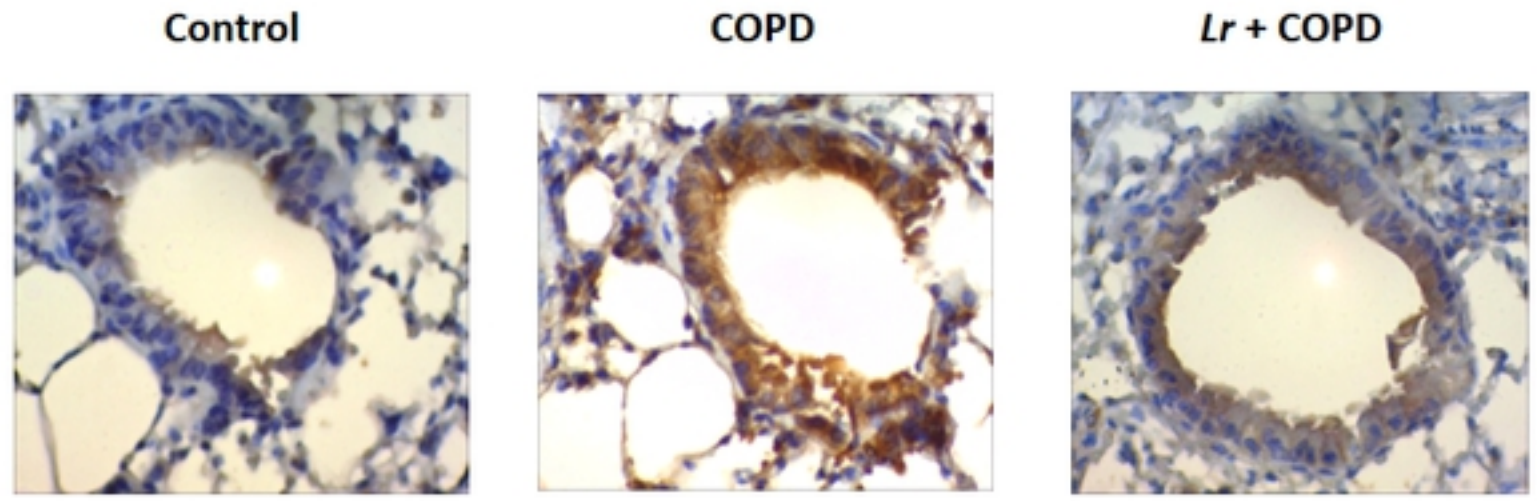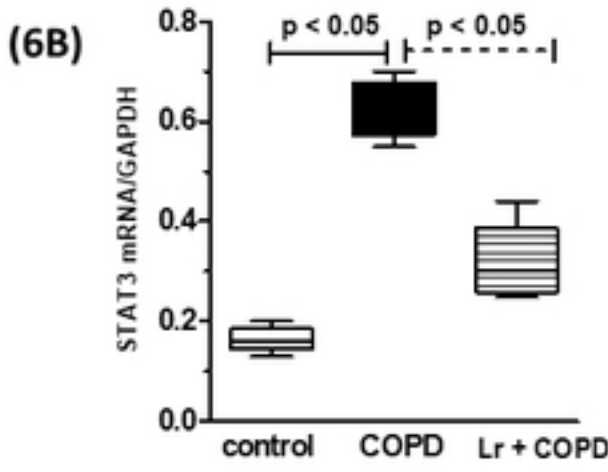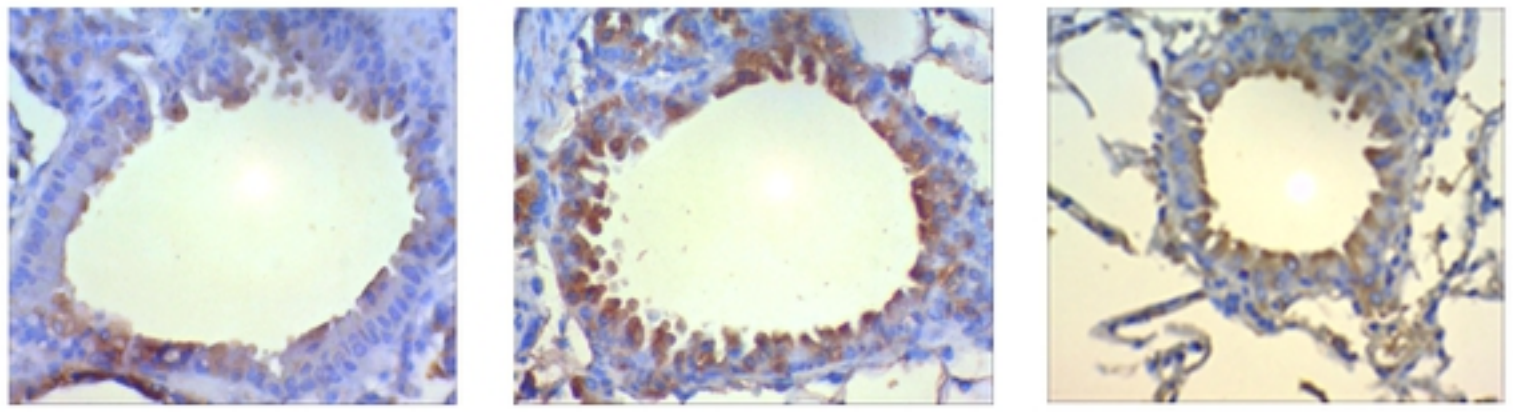

Figure 6

Figure 7

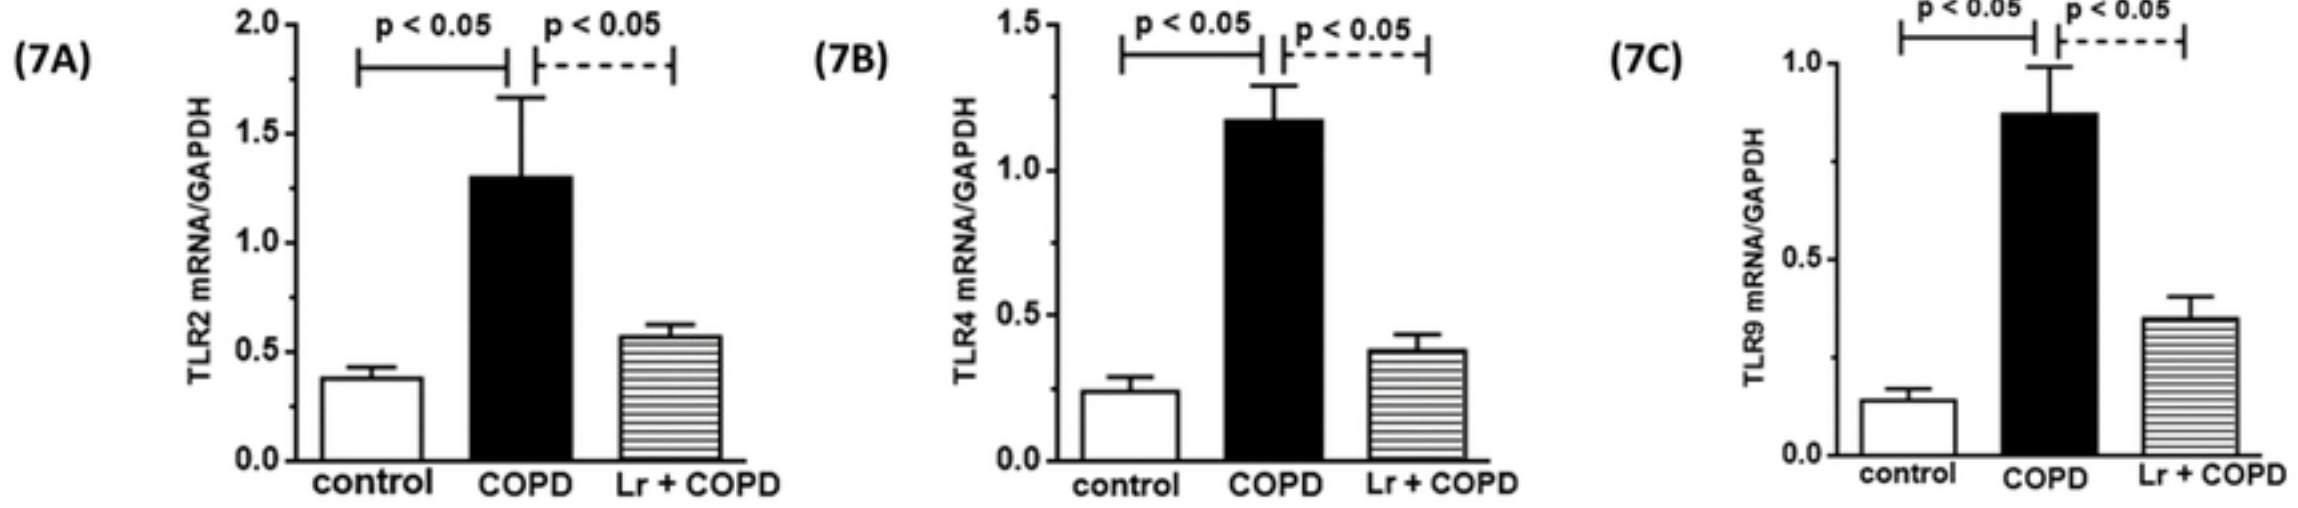

Figure 7

Figure 8

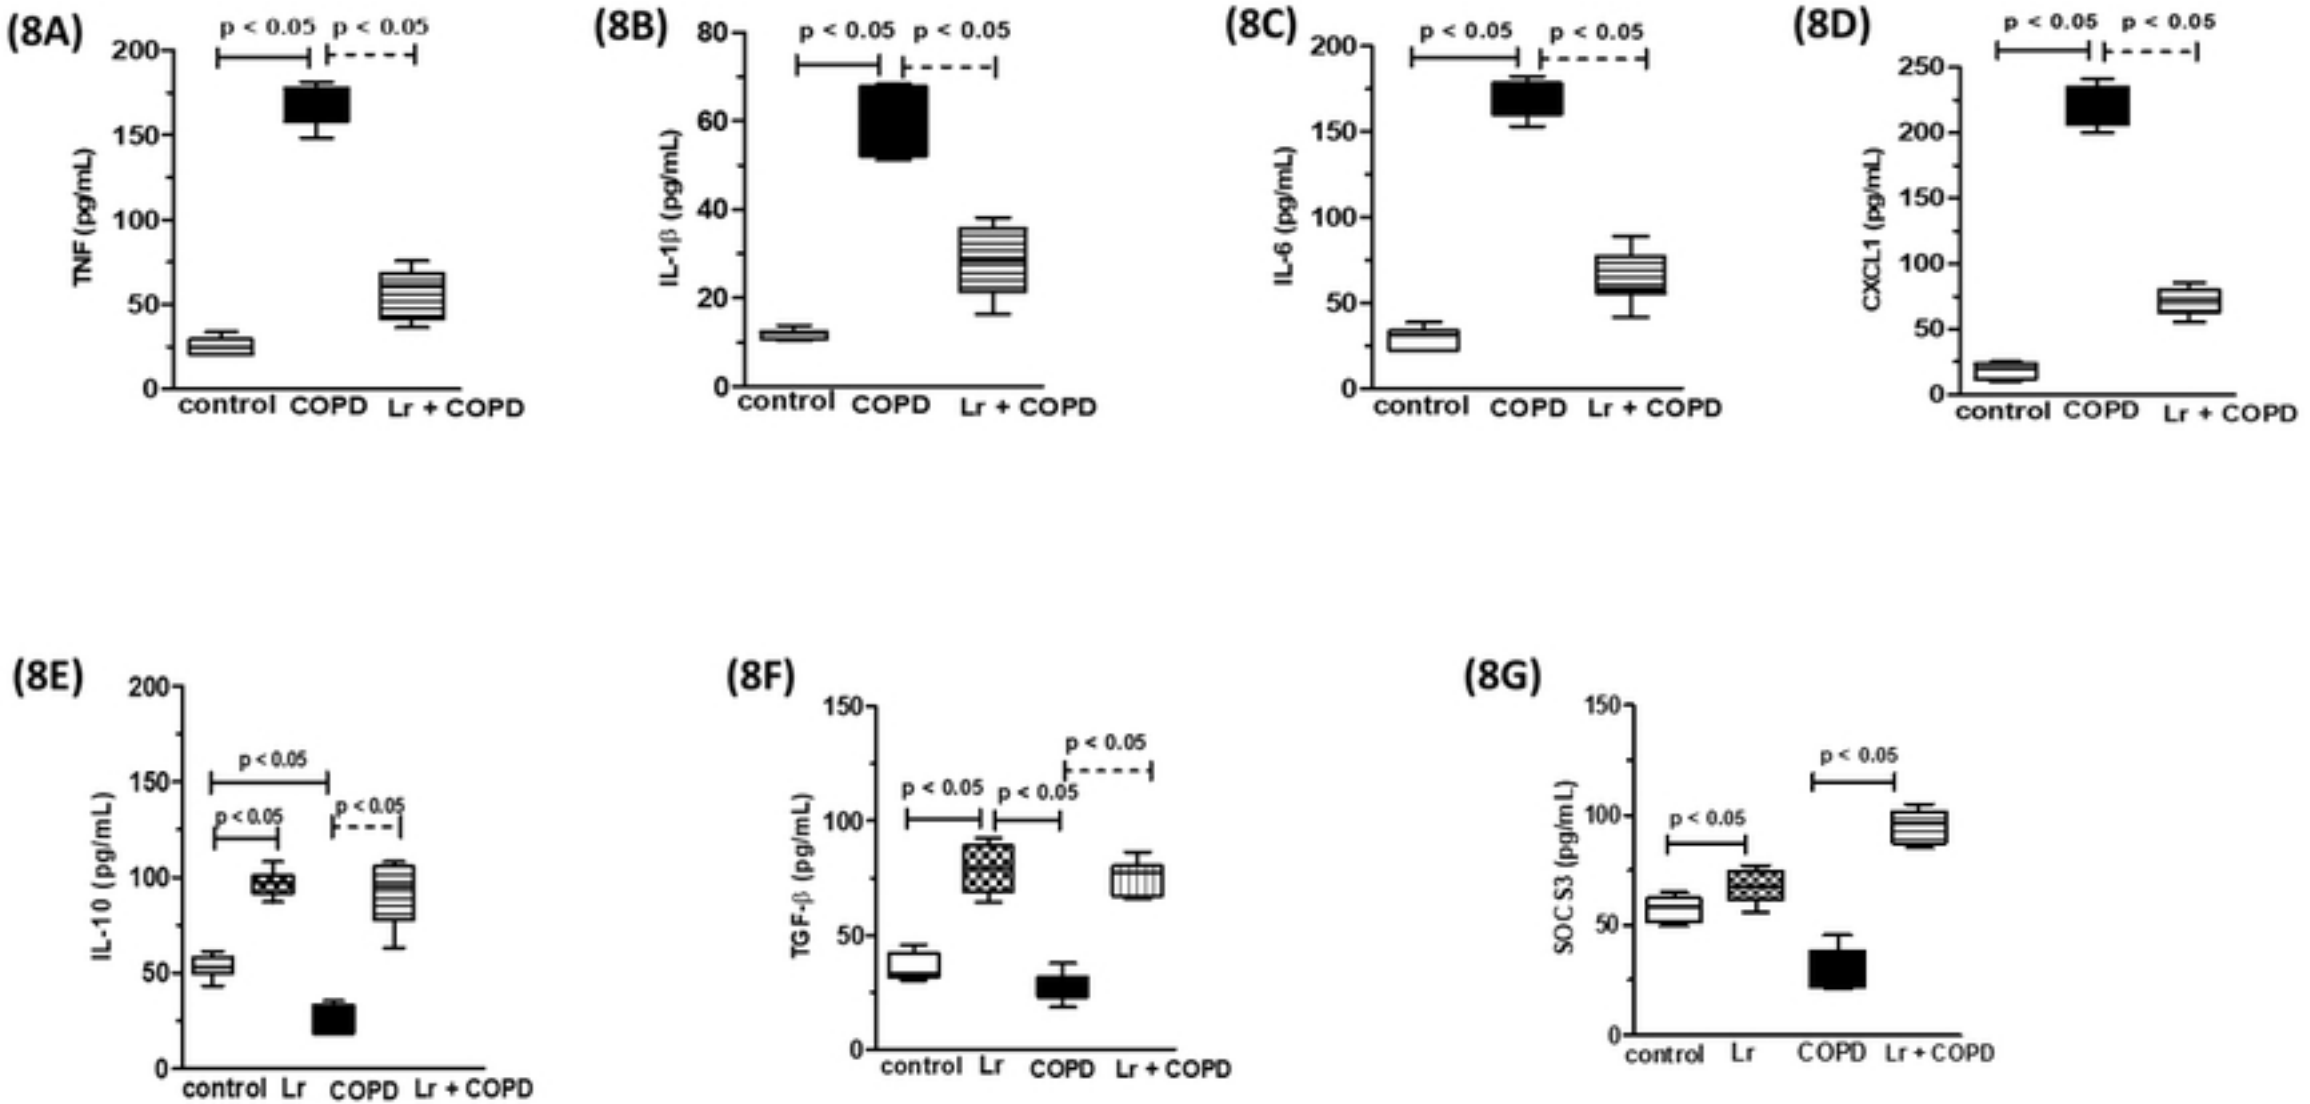

Figure 8



Figure 9

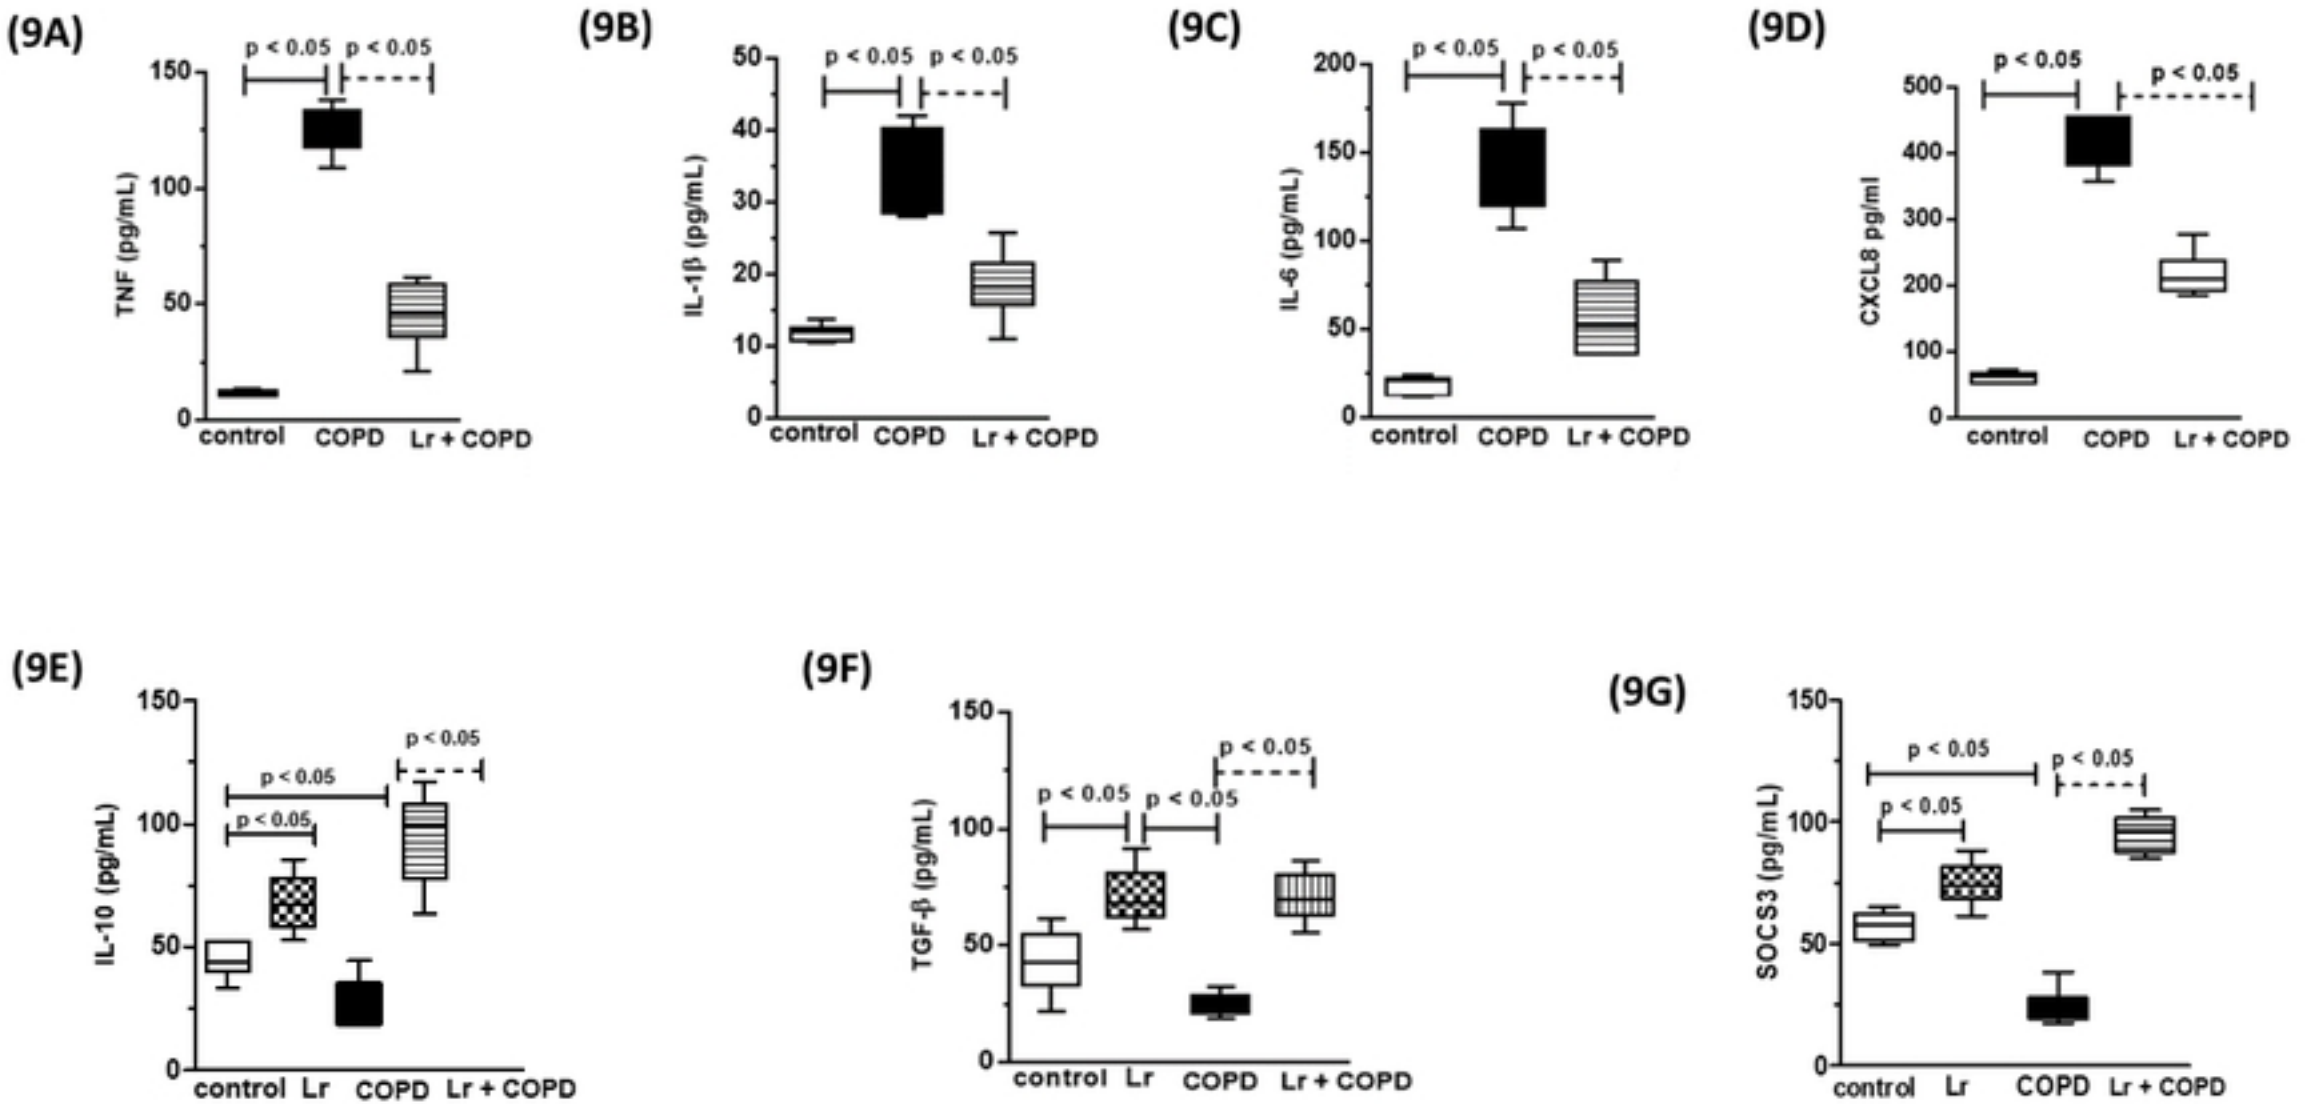

Figure 9

Figure 10

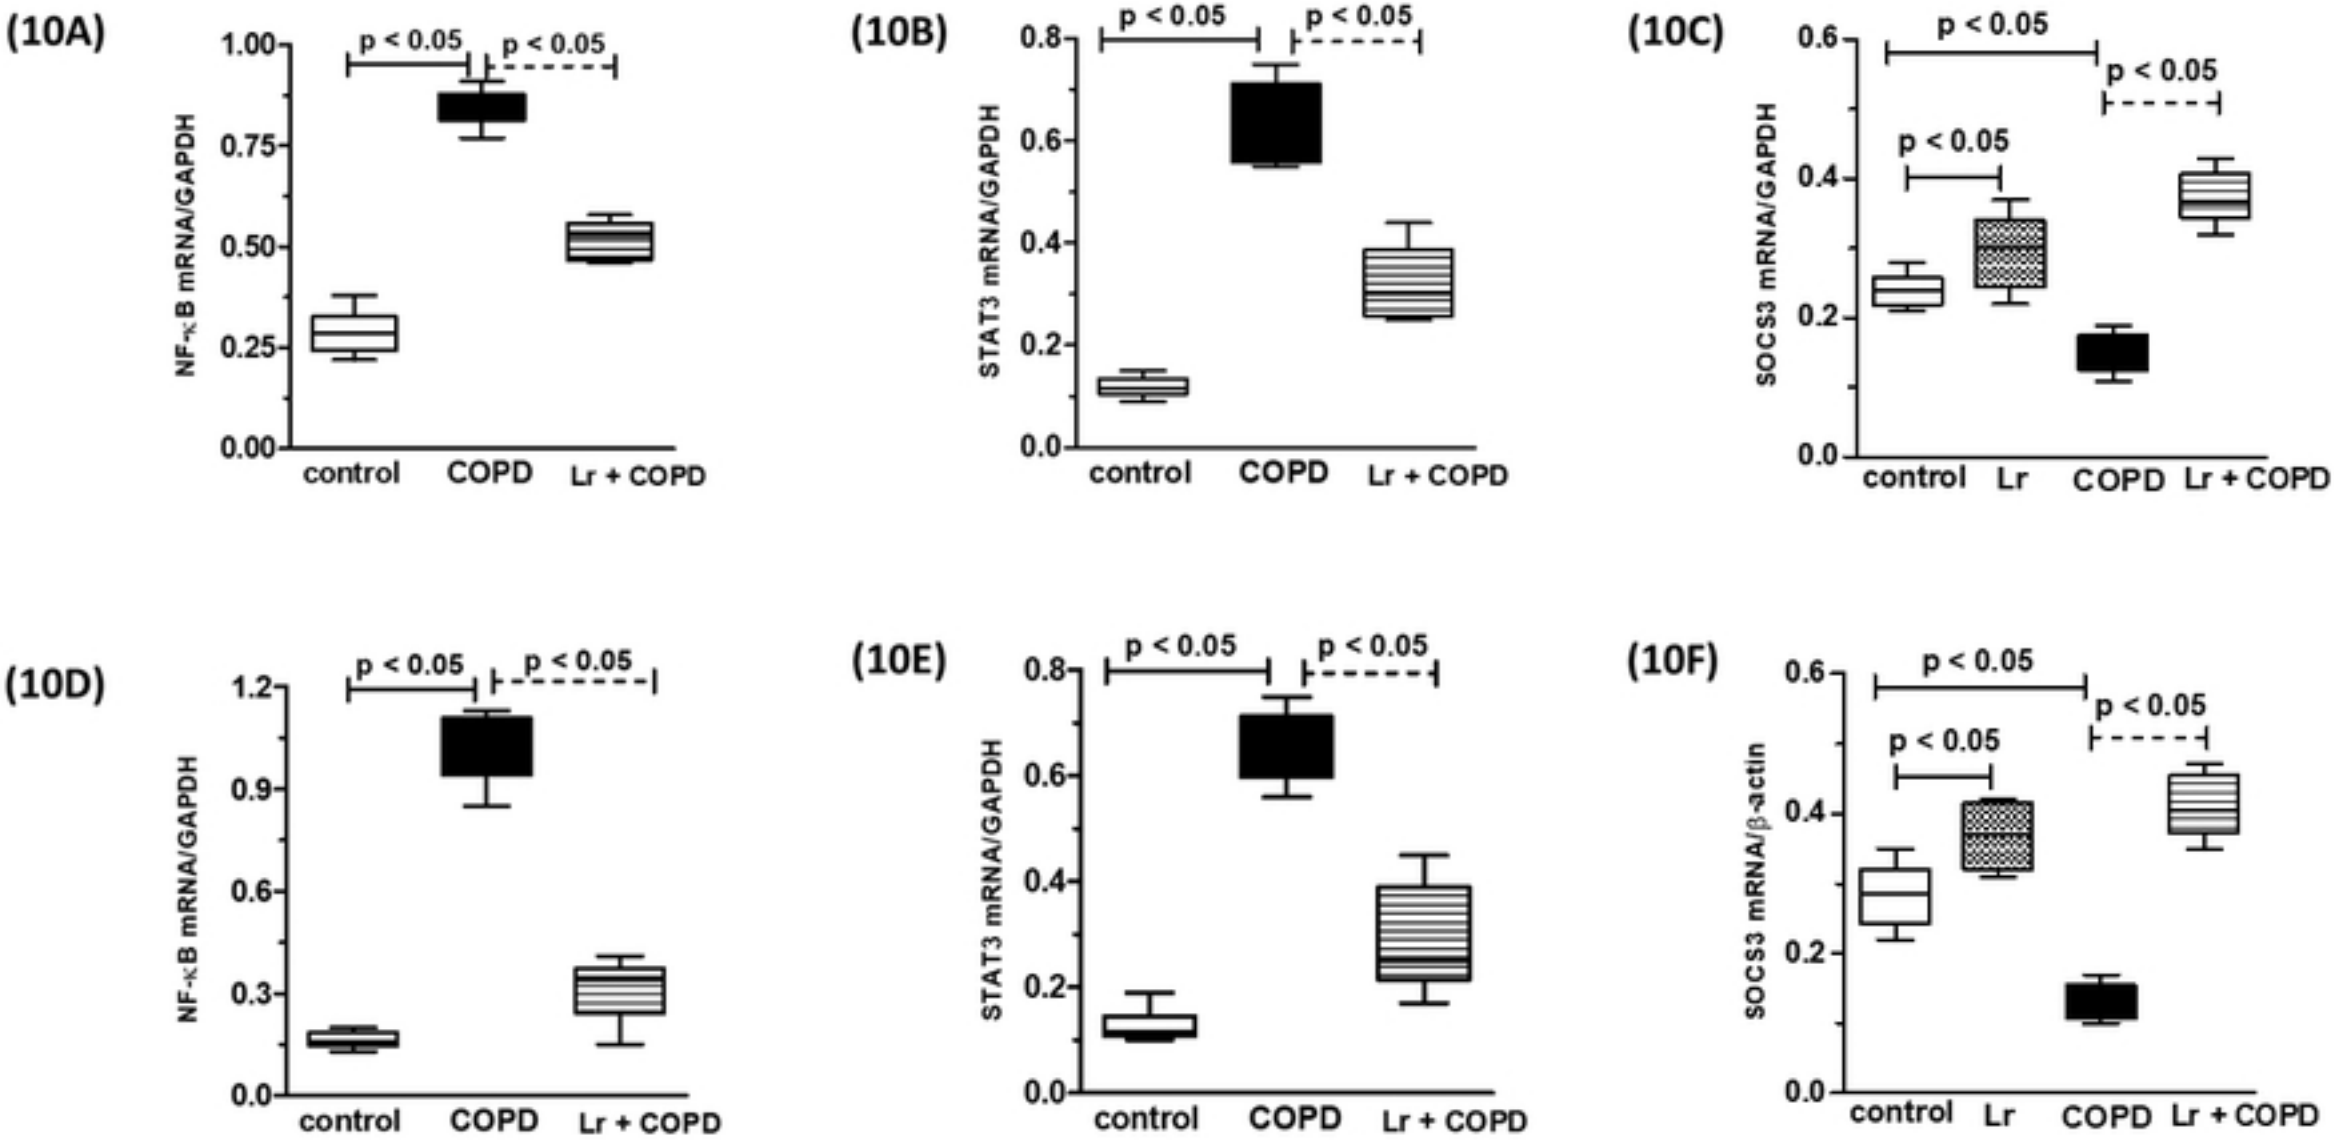

Figure 10

Figure 1

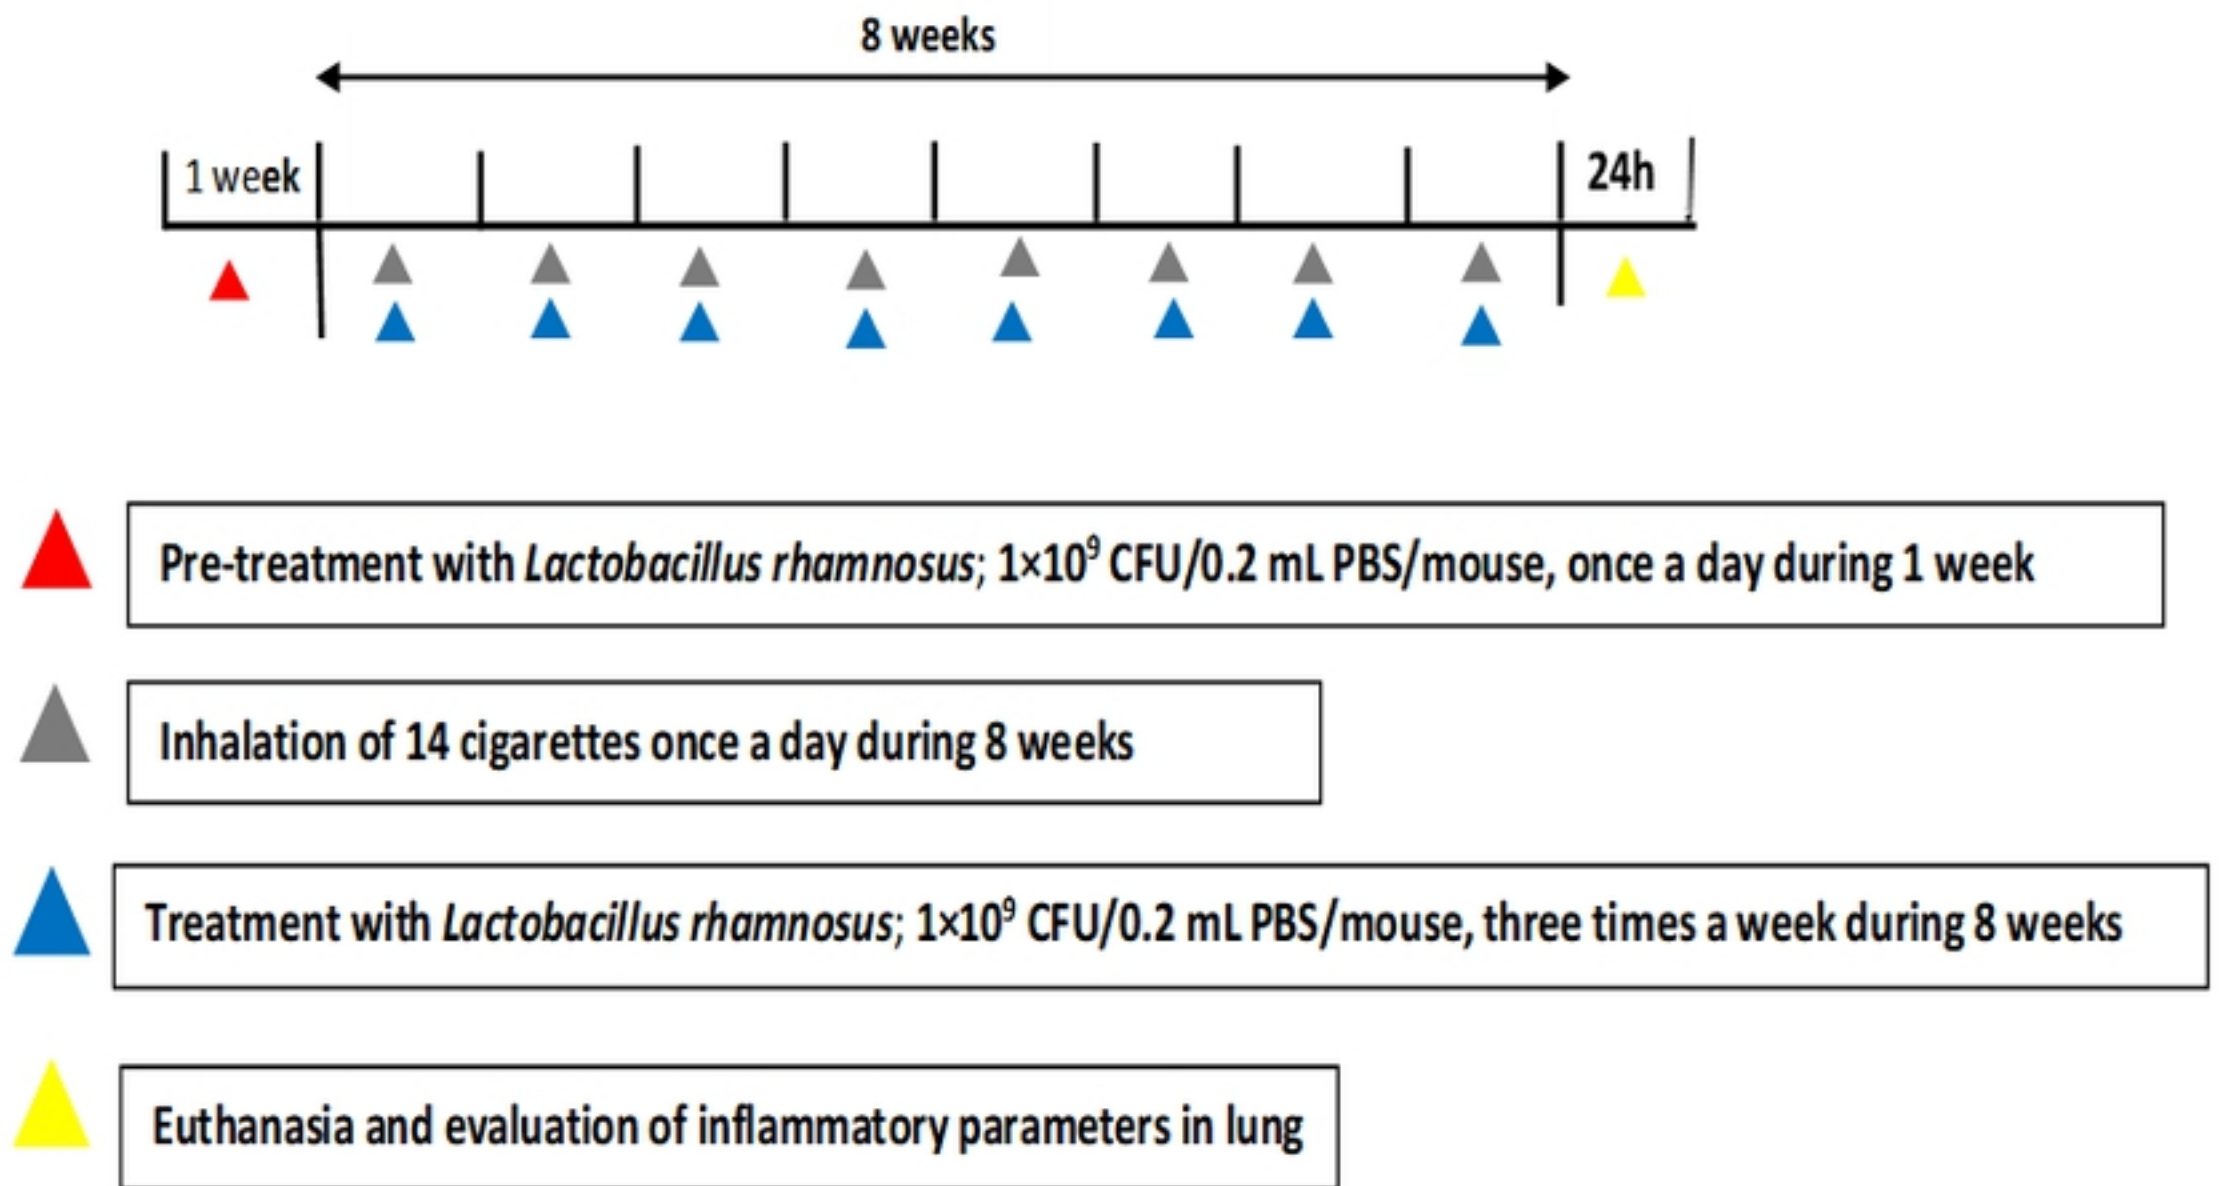

Figure 1
